# Supplementary material for: Does psychedelic drug use reduce risk of suicidality? Evidence from a longitudinal community-based cohort of marginalised women in a Canadian setting
Source: PubMed Central journal article supplement — BMJ Open. 2017 Sep 21;7(9):e016025. doi: 10.1136/bmjopen-2017-016025 (PMC5623475; doi:10.1136/bmjopen-2017-016025), 2017-09-21
Supplement: bmjopen-2017-016025.draft_revisions.pdf [file bmjopen-2017-016025.draft_revisions.pdf]

# BMJ Open

BMJ Open is committed to open peer review. As part of this commitment we make the peer review history of every article we publish publicly available.

When an article is published we post the peer reviewers' comments and the authors' responses online. We also post the versions of the paper that were used during peer review. These are the versions that the peer review comments apply to.

The versions of the paper that follow are the versions that were submitted during the peer review process. They are not the versions of record or the final published versions. They should not be cited or distributed as the published version of this manuscript.

BMJ Open is an open access journal and the full, final, typeset and author-corrected version of record of the manuscript is available on our site with no access controls, subscription charges or pay-per-view fees (<http://bmjopen.bmj.com>).

If you have any questions on BMJ Open's open peer review process please email [info.bmjopen@bmj.com](mailto:info.bmjopen@bmj.com)

# BMJ Open

## Psychedelic use predicts reduced suicidality: Findings from a longitudinal study of women sex workers

|                                 |                                                                                                                                                                                                                                                                                                                                                                                                                                                                                                                                                                                    |
|---------------------------------|------------------------------------------------------------------------------------------------------------------------------------------------------------------------------------------------------------------------------------------------------------------------------------------------------------------------------------------------------------------------------------------------------------------------------------------------------------------------------------------------------------------------------------------------------------------------------------|
| Journal:                        | <i>BMJ Open</i>                                                                                                                                                                                                                                                                                                                                                                                                                                                                                                                                                                    |
| Manuscript ID                   | bmjopen-2017-016025                                                                                                                                                                                                                                                                                                                                                                                                                                                                                                                                                                |
| Article Type:                   | Research                                                                                                                                                                                                                                                                                                                                                                                                                                                                                                                                                                           |
| Date Submitted by the Author:   | 23-Jan-2017                                                                                                                                                                                                                                                                                                                                                                                                                                                                                                                                                                        |
| Complete List of Authors:       | Argento, Elena; BC Centre for Excellence in HIV/AIDS; University of British Columbia, Interdisciplinary Studies<br>Strathdee, Steffanie; University of California San Diego, Medicine<br>Tupper, Kenneth; University of British Columbia, School of Population and Public Health<br>Braschel, Melissa; BC Centre for Excellence in HIV/AIDS, Gender and Sexual Health Initiative<br>Wood, Evan; BC Centre for Excellence in HIV/AIDS<br>Shannon, Kate; British Columbia Centre for Excellence in HIV/AIDS; University of British Columbia, Division of AIDS Department of Medicine |
| <b>Primary Subject Heading</b>: | Public health                                                                                                                                                                                                                                                                                                                                                                                                                                                                                                                                                                      |
| Secondary Subject Heading:      | Evidence based practice, Epidemiology, Mental health                                                                                                                                                                                                                                                                                                                                                                                                                                                                                                                               |
| Keywords:                       | sex workers, psychedelics, hallucinogens, MENTAL HEALTH, Suicide & self-harm < PSYCHIATRY                                                                                                                                                                                                                                                                                                                                                                                                                                                                                          |
|                                 |                                                                                                                                                                                                                                                                                                                                                                                                                                                                                                                                                                                    |

SCHOLARONE™  
Manuscripts

Only

1  
2  
3  
4  
5  
6  
7  
8  
9  
10  
11  
12  
13  
14

## Psychedelic use predicts reduced suicidality: Findings from a longitudinal study of women sex workers

Elena Argento, *PhD student*<sup>1,2</sup>, Steffanie A. Strathdee, *associate dean*<sup>3</sup>, Kenneth Tupper, *adjunct professor*<sup>4</sup>, Melissa Braschel, *statistician*<sup>1</sup>, Evan Wood, *professor*<sup>1,4</sup>, Kate Shannon, *associate professor*<sup>1,4</sup>

- 15  
16  
17  
18  
19  
20  
21  
22  
23  
24  
25  
26  
27  
28  
29  
30  
31  
32
- 1) BC Centre for Excellence in HIV/AIDS, St. Paul's Hospital, 608-1081 Burrard Street, Vancouver, BC, Canada V6Z 1Y6
  - 2) Interdisciplinary Studies Graduate Program, University of British Columbia, 2357 Main Mall, Vancouver, BC, Canada V6T 1Z4
  - 3) Department of Medicine, University of California San Diego, 9500 Gilman Drive, La Jolla, CA, USA 92093-0507
  - 4) School of Population and Public Health, Faculty of Medicine, University of British Columbia, 2206 East Mall, Vancouver, BC, Canada V6T 1Z9

33  
34  
35  
36  
37  
38  
39  
40  
41  
42  
43  
44  
45  
46  
47  
48  
49  
50  
51  
52  
53  
54  
55  
56  
57  
58  
59  
60

**Send correspondence to:** **Kate Shannon**, PhD, MPH  
Associate Professor, Department of Medicine  
University of British Columbia  
Director, Gender and Sexual Health Initiative  
B.C. Centre for Excellence in HIV/AIDS  
St. Paul's Hospital, 608-1081 Burrard Street, Vancouver, B.C.,  
V6Z 1Y6, Canada  
**Tel:** (604) 804-9459  
**Fax:** (604) 806-9044  
**Email:** [gshi@cfenet.ubc.ca](mailto:gshi@cfenet.ubc.ca)

Word Count: 2769

## ABSTRACT

**Objective:** This study aimed to longitudinally investigate whether ever having used a psychedelic drug can have a protective effect on incidence of suicidality among sex workers.

**Design:** Longitudinal cohort study.

**Setting:** Data were drawn from a prospective, community-based cohort of women sex workers, known as AESHA (An Evaluation of Sex Workers Health Access), in Vancouver, Canada.

**Participants:** 766 sex workers completed the AESHA baseline questionnaire between January 2010 and August 2014. Participants who did not report suicidality at baseline and who completed at least one follow-up visit were included.

**Main outcome measure:** Extended Cox regression was used to model predictors of new suicidality (suicide ideation or attempts) over 54 months follow-up.

**Results:** Nearly half (46%; n=355) of participants reported suicidality and were thus excluded from the present analyses. Of 290 sex workers eligible at baseline, 11% (n=31) reported recent suicidality during follow-up, with an incidence density of 4.42 per 100 person-years (95% Confidence Interval [CI] 3.10 to 6.30). In multivariable analysis, reported lifetime psychedelic drug use was associated with a 60% reduced hazard for suicidality (Adjusted Hazard Ratio [AHR] 0.40; 95%CI 0.17 to 0.94). Crystal methamphetamine use (AHR 3.25; 95%CI 1.47 to 7.21) and childhood abuse (AHR 3.54; 95%CI 1.49 to 8.40) remained independent predictors of suicidality.

**Conclusion:** The high rate of suicidality among sex workers is of major concern. Alongside emerging evidence on the potential of psychedelic-assisted therapy to treat mental health and addiction issues, our findings demonstrate that non-medical psychedelic drug use is independently associated with reduced suicidality, while other illicit drug use and childhood trauma predispose sex workers to suicidality. While observational, this study supports calls for further research and innovative interventions to address suicide risk, including investigation of the therapeutic utility of psychedelics.

**Word Count:** 287

**Keywords:** *sex workers, psychedelics, hallucinogens, suicide prevention, mental health, substance use*

### Strengths and limitations of this study

- This is the first study to longitudinally investigate the impact of psychedelic drug use on suicidality among sex workers.
- This community-based study among women sex workers demonstrates that historical psychedelic drug use independently predicts reduced suicidality and supports calls for further research and innovative interventions to address suicide risk, including investigation of the therapeutic utility of psychedelics.
- The study population included women from a wide-ranging representation of sex work environments, increasing generalizability.
- The mapping of working areas and time–location sampling helped to ensure a representative sample and to minimize selection bias.
- Data were self-reported and variables examined included highly stigmatized topics, introducing the potential for recall bias, social desirability and reporting bias.

## INTRODUCTION

Despite efforts to improve mental health over the last 60 years, suicide remains a critical public health concern worldwide [1,2]. Suicide was the second leading cause of death globally in 2012 among 15-29 year olds [2], with an estimated 80-90% of suicide deaths attributable to mental health or substance use disorders [3,4]. Significant gaps remain in empirical research examining suicidality among marginalized populations. Women sex workers experience disproportionately high levels of social and health-related risks and harms, including stigma, discrimination, and violence [5–7], and previous studies highlight the unmet mental health needs of sex workers, underscoring the associations of social exclusion, depression, and post-traumatic stress disorder (PTSD) with suicidality [8–12]. Research demonstrates greater risk for suicidality among those with a history of trauma [1,13] and among women sex workers who report historical experiences of violence and childhood abuse [8–10,14,15]. Further, Indigenous women are vastly overrepresented among street-based sex workers in North America, and face devastating and multigenerational effects of trauma and social dislocation (e.g., high burden of mental illness and suicidality) as a result of colonialism, racialized policies, and displacement from land and home communities [16,17].

Various biological, interpersonal, and socio-structural factors (e.g., social exclusion/isolation, education level, employment) contribute to our understanding of suicidal behaviors [1,18]. Given the complex etiological pathways to suicide and ineffectiveness of interventions to reduce the burden of suicidality, the US National Institute of Mental Health has called for innovative research on suicide prevention and treatment for suicidality [19].

1  
2  
3 A number of psychedelic drug therapies are being revisited following a 40-year hiatus in  
4 research for the treatment of depression, anxiety, PTSD, eating disorders, and addiction [20].  
5  
6 Psychedelic drugs include lysergic acid diethylamide (LSD), psilocybin, dimethyltryptamine  
7 (DMT), mescaline, and methylenedioxymethamphetamine (MDMA), many of which are being  
8 investigated in clinical/pre-clinical studies for their neuropharmacological functions and  
9 potential as adjuncts to psychotherapy [21,22]. While renewed interest in psychedelic medicine  
10 is challenged by various funding, methodological, and legal impediments, the emerging evidence  
11 indicating improved outcomes for some individuals suffering from mental health and addiction  
12 issues has generated new scientific inquiry and an imposing obligation to advance this research  
13 [20,23,24]. Recent observational studies in the US demonstrate significant associations between  
14 lifetime psychedelic use and reduced recidivism and intimate partner violence among  
15 populations of prison inmates [25,26], and reduced psychological distress and suicidality among  
16 the general adult population [27–29].  
17  
18  
19  
20  
21  
22  
23  
24  
25  
26  
27  
28  
29  
30  
31  
32  
33  
34  
35

36 Despite the multifaceted vulnerabilities experienced by sex workers, there remains a paucity of  
37 data on suicide rates and research that systematically examines factors that potentiate or mitigate  
38 suicidality among sex workers, particularly in the global north. Some evidence suggests that  
39 psychedelic drug use may be protective with regard to suicidality [27–29] and is associated with  
40 significant improvements in psychological wellbeing and reductions in depression and anxiety in  
41 clinical settings [30–35], yet existent research is characterized by large gaps. Given the urgency  
42 of addressing and preventing suicide and calls for prioritizing innovative treatments in the wake  
43 of largely ineffective interventions, this study aimed to longitudinally investigate whether  
44 lifetime psychedelic drug use is associated with a reduced incidence of suicidality (suicide  
45  
46  
47  
48  
49  
50  
51  
52  
53  
54  
55  
56  
57  
58  
59  
60

1  
2  
3 ideation or attempts) among women sex workers. We postulated that psychedelic drug use would  
4  
5 have an independent protective effect on suicidality over the study period.  
6  
7  
8  
9

## 10 **METHODS**

### 11 **Study Design and Participants**

12  
13 Data for this study were drawn from a large, community-based, prospective cohort of over 800  
14  
15 women sex workers initiated in 2010, known as AESHA (An Evaluation of Sex Workers Health  
16  
17 Access). Eligibility criteria for study participants included cisgender or transgender women, 14  
18  
19 years of age or older, who exchanged sex for money within the last 30 days. AESHA participants  
20  
21 completed interviewer-administered questionnaires and HIV/STI/HCV serology testing at  
22  
23 enrollment and biannually. Interview, outreach and nursing staff included experiential  
24  
25 individuals (current/former sex workers) with substantial community experience. Participants  
26  
27 were recruited across Metro Vancouver using time-location sampling and community mapping  
28  
29 strategies, with day and late-night outreach to outdoor sex work locations (i.e., streets,  
30  
31 alleyways), indoor sex work venues (i.e., massage parlors, micro-brothels, and in-call locations),  
32  
33 and online. Weekly outreach is conducted to over 100 sex work venues by outreach/nursing  
34  
35 teams operating a mobile van, with regular contact as well as encouraging drop-in to women-  
36  
37 only spaces at the research office, contributing to an annual retention rate of >90% for AESHA  
38  
39 participants.  
40  
41  
42  
43  
44  
45  
46  
47  
48  
49

50  
51 The main interview questionnaire elicits responses related to socio-demographics (e.g., sexual  
52  
53 identity, ethnicity, housing), the work environment (e.g., access to services, violence/safety,  
54  
55 policing, incarceration), client characteristics (e.g., types/fees of services, condom use), intimate  
56  
57  
58  
59  
60



1  
2  
3 partners (e.g., sexual history, cohabitation, financial support), trauma and violence (e.g., lifetime  
4 and childhood trauma, exposure to intimate partner and workplace violence), and comprehensive  
5 injection and non-injection drug use patterns. The clinical questionnaire relates to overall  
6 physical, mental, and emotional health, and HIV testing and treatment experiences to support  
7 education, referral, and linkages with care. The research team works in close partnership with the  
8 affected community and a diversity of stakeholders (e.g., legal/human rights experts,  
9 community-based organizations, service providers, health authorities, government officials, and  
10 international policy bodies) and regularly engages in knowledge exchange efforts. AESHA is  
11 monitored by a Community Advisory Board of over 15 sex work, women's health and HIV  
12 service agencies, as well as representatives from the health authority and policy experts, and  
13 holds ethical approval through Providence Health Care/University of British Columbia Research  
14 Ethics Board. All participants receive an honorarium of \$40 CAD at each bi-annual visit for their  
15 time, expertise and travel.  
16  
17  
18  
19  
20  
21  
22  
23  
24  
25  
26  
27  
28  
29  
30  
31  
32  
33  
34  
35

### 36 **Statistical Analyses**

37  
38 Analyses were restricted to AESHA participants who had never thought about or attempted  
39 suicide at baseline and completed at least one follow-up visit between January 2010 and August  
40 2014. The outcome of interest was a first episode of suicidality, defined as responding 'yes' to  
41 having thought about or attempted suicide in the last six months. Time-fixed variables examined  
42 included age (continuous), gender/sexual minority (lesbian, gay, bisexual, trans, or two-spirit),  
43 Indigenous ancestry (inclusive of First Nations, Metis, and Inuit), being an im/migrant worker  
44 (versus Canadian born), education (high school or greater), and physical and/or sexual childhood  
45 abuse (before age 18). Variables treated as time-updated covariates based on bi-annual follow-up  
46  
47  
48  
49  
50  
51  
52  
53  
54  
55  
56  
57  
58  
59  
60

1  
2  
3 data included HIV/STI serostatus, recent homelessness, recent physical and/or sexual violence  
4 by clients, recent police harassment and/or arrest, and primary place to solicit clients. Time-  
5 updated injection and non-injection drug use variables included use of psychedelics (any  
6 hallucinogens, including LSD/acid, magic mushrooms/psilocybin, salvia, ecstasy/MDMA),  
7 marijuana, pharmaceutical opioids (any street methadone/suboxone, dilaudid, morphine,  
8 oxycontin, percocet/vicodin/demerol, or T3s/T4s), crack, cocaine, crystal methamphetamine, and  
9 heroin.  
10  
11  
12  
13  
14  
15  
16  
17  
18  
19  
20  
21

22 Using extended Cox regression, unadjusted and adjusted hazard ratios (HR and AHR) and 95%  
23 confidence intervals (CI) were calculated to identify predictors of suicidality. Variables  
24 hypothesized a priori to be predictors of suicidality and those that were significantly correlated  
25 with the outcome at the  $p < 0.05$  level in bivariate analyses were subsequently fitted into a  
26 multivariable Cox model. Backward model selection was used to determine the final  
27 multivariable model with the best overall fit, as indicated by the lowest Akaike information  
28 criterion (AIC) value. A complete case analysis was used, where observations with missing data  
29 were excluded from analyses, and participants who were lost to follow-up were right censored at  
30 their most recent study visit. All statistical analyses were performed using SAS software version  
31 9.4 (SAS Institute, Cary, NC, USA). Two-sided p-values are reported.  
32  
33  
34  
35  
36  
37  
38  
39  
40  
41  
42  
43  
44  
45  
46  
47

## 48 RESULTS

49  
50 Of the total 766 sex workers who completed the AESHA baseline questionnaire, 46% (n=355)  
51 reported ever experiencing suicidality (45%; n=343 reported suicidal thoughts, 32%; n=245  
52 attempted suicide) and were thus excluded from this analysis. Those with missing observations  
53  
54  
55  
56  
57  
58  
59  
60

1  
2  
3 for suicidality at baseline (n=50/766; 6.5%) were excluded from analysis, and one additional  
4 participant was excluded because reported suicidality was missing at follow-up. A total of 290  
5 sex workers without suicidality who completed at least one follow-up visit were eligible for  
6 inclusion in the present analysis. Participants were followed for a total of 53.5 months (median =  
7 29.9 months). Baseline characteristics of participants who reported suicidality during follow-up  
8 compared to those who did not are displayed in Table 1.  
9  
10  
11  
12  
13  
14  
15  
16  
17  
18  
19

20 Overall, 11% (n=31) thought about or attempted suicide for the first time during follow-up, with  
21 an incidence density of 4.42 per 100 person-years (95%CI 3.10 to 6.30). The median age was 36  
22 (interquartile range [IQR] 29 to 42) and 16% (n=45) of participants identified as gender or sexual  
23 minorities. One third (n=93) reported Indigenous ancestry and one quarter (n=73) had been  
24 homeless in the last six months. Half of participants (49%; n=142) solicited clients on the streets,  
25 and 37% (n=106) solicited clients in indoor establishments. In terms of occupational violence,  
26 14% (n=41) and 37% (n=107) reported physical/sexual violence from clients and police  
27 harassment/arrest, respectively. Nearly half (47%; n=136) of participants reported ever being  
28 physically and/or sexually abused before age 18, and among those who reported suicidality, 77%  
29 (n=24/31) experienced childhood abuse compared to 43% (n=112/259) among those who did not  
30 report suicidality (p<0.001). Overall HIV prevalence was 11% (n=33).  
31  
32  
33  
34  
35  
36  
37  
38  
39  
40  
41  
42  
43  
44  
45  
46  
47

48 The majority of participants (63%, n=184) reported ever using crack and 56% (n=162) reported  
49 ever using cocaine, with higher proportions of crack and cocaine use among those reporting  
50 suicidality than those who did not (p=0.003). Close to half (49%, n=141) reported lifetime heroin  
51 use, which was significantly higher among those who reported suicidality than those who did not  
52  
53  
54  
55  
56  
57  
58  
59  
60

1  
2  
3 (68% vs. 46%,  $p=0.02$ ). Approximately one third (31%,  $n=90$ ) of participants had ever used  
4  
5 crystal methamphetamine, and this was significantly higher among those who reported  
6  
7 suicidality than those who did not (58% vs. 28%,  $p<0.001$ ). Overall, 27% ( $n=79$ ) of participants  
8  
9 reported ever using a psychedelic substance.  
10  
11

12  
13  
14  
15 Unadjusted and adjusted hazard ratios for factors associated with a first episode of suicidality  
16  
17 during follow-up are displayed in Table 2. In the final multivariable model, crystal  
18  
19 methamphetamine use (AHR 3.25; 95%CI 1.47 to 7.21) and physical and/or sexual childhood  
20  
21 abuse (AHR 3.54; 95%CI 1.49 to 8.40) remained independently associated with time to  
22  
23 suicidality. Psychedelic use was associated with a 60% reduced hazard of suicidality (AHR 0.40;  
24  
25 95%CI 0.17 to 0.94).  
26  
27  
28  
29  
30  
31

## 32 DISCUSSION

33  
34 This study demonstrated that among women sex workers, a population at disproportionately  
35  
36 elevated risk for psychological distress and suicide, lifetime psychedelic drug use predicted a  
37  
38 reduced hazard for suicidality. Crystal methamphetamine use and childhood abuse predisposed  
39  
40 sex workers to suicidality corresponding to more than a three-fold increased hazard. Suicidality  
41  
42 was highly prevalent, with almost half of sex workers reporting lifetime suicidality at baseline,  
43  
44 and 11% reporting a first episode of suicidality in the last six months during follow-up. Few  
45  
46 studies have longitudinally examined predictors of suicidality among sex workers, and of the  
47  
48 available data, most are cross-sectional and/or conducted in lower and middle income settings  
49  
50 [8,15,36,37]. The present study, based on a community-based, prospective cohort of sex workers,  
51  
52  
53  
54  
55  
56  
57  
58  
59  
60

1  
2  
3 adds to a growing body of literature documenting the protective and therapeutic potentials of  
4  
5  
6  
7  
8  
9  
10  
11  
12  
13  
14  
15  
16  
17  
18  
19  
20  
21  
22  
23  
24  
25  
26  
27  
28  
29  
30  
31  
32  
33  
34  
35  
36  
37  
38  
39  
40  
41  
42  
43  
44  
45  
46  
47  
48  
49  
50  
51  
52  
53  
54  
55  
56  
57  
58  
59  
60  
adds to a growing body of literature documenting the protective and therapeutic potentials of  
psychedelic substances [20,23,33,38,39].

Data were self-reported, and questions pertaining to events that occurred in the past may be  
subject to recall bias. Variables examined included sensitive and highly stigmatized topics such  
as childhood trauma, violence, and illicit drug use, which introduce the potential for social  
desirability and reporting bias. However, the likelihood of these biases is reduced by the  
community-based nature of the study. Suicidality among sex workers is influenced by complex  
individual, interpersonal and structural variables, some of which may have not been measured in  
this study. While lifetime psychedelic drug use was found to reduce the hazard of suicidality, the  
associations uncovered in this analysis cannot be determined as causal. The study population  
included women from a wide-ranging representation of sex work environments, yet findings may  
not be fully generalizable to sex workers in other settings. The mapping of working areas and  
time–location sampling helped to ensure a representative sample and to minimize selection bias.

Prior cross-sectional research conducted in Sydney, Australia demonstrated significant links  
between depression, trauma, and suicidality, where an estimated 42% of street-based female sex  
workers reported attempting suicide and 74% reported lifetime suicidal ideation [10,36]. While  
estimates of mental illness vary significantly across sex work settings, up to three-quarters of sex  
workers in a US study reported severe depression, anxiety, or PTSD [12]. In studies conducted in  
Asia, recent suicide attempts ranged from 19% among sex workers in Goa, India [15] to 38%  
among sex workers in China [8,11,40]. Transgender women involved in sex work, a population  
experiencing significant psychosocial vulnerability, report notably further elevated rates of

1  
2  
3  
4  
5  
6  
7  
8  
9  
10  
11  
12  
13  
14  
15  
16  
17  
18  
19  
20  
21  
22  
23  
24  
25  
26  
27  
28  
29  
30  
31  
32  
33  
34  
35  
36  
37  
38  
39  
40  
41  
42  
43  
44  
45  
46  
47  
48  
49  
50  
51  
52  
53  
54  
55  
56  
57  
58  
59  
60

suicidality: three quarters of participants in San Francisco reported suicide ideation, of whom 64% attempted suicide [41]. Our findings extend upon research establishing associations between lifetime use of illicit drugs and increased risk for suicidality: in bivariate analysis, all classes of illicit drugs were demonstrated to increase the hazard of suicidality with the exception of psychedelics. In multivariable analysis, psychedelics were independently associated with a 60% reduced hazard for suicidality, contributing to emergent evidence on the potential of psychedelics to mitigate risks for suicide.

Among the various scientific studies examining the potential benefits of psychedelic drug use, a recent and large (n>190,000) longitudinal study conducted among the general US adult population demonstrated that psychedelics are associated with reduced psychological distress and suicidality [27]. A recent open-label trial conducted in the UK demonstrated the safety and efficacy of psilocybin for treating major depression [30], and another open-label trial in Brazil found rapid and sustained anti-depressant effects from the Amazonian psychedelic brew ayahuasca administered in a clinical setting [32]. The ways in which psychedelics may alleviate suffering associated with mental health is undoubtedly a complex phenomenon. It has been hypothesized that psychedelics modify neurobiological processes involved in suicidality by down-regulating 5-HT<sub>2A</sub> serotonin receptors, as increased binding (and up-regulation) of this receptor has been implicated in major depression and suicide [33,39,42]. Further, psychedelics are evidenced to alter neural network connectivity and enhance recall of autobiographical memories, which may facilitate positive reprocessing of trauma [21,43,44]. Recent randomized, placebo-controlled, cross-over studies found that psilocybin (among n=25 adults) and LSD (among n=20 adults) were associated with increased positive mood and psychological wellbeing

1  
2  
3 [31,33], supporting other work demonstrating the anti-depressive/anxiolytic effects of  
4  
5 psychedelics [22,34,45,46]. The potential of psychedelics to elicit “mystical-type” experiences,  
6  
7 with profound and sustained positive changes in attitudes and mood, may play a key role in  
8  
9 addiction treatment interventions [35,39,47,48]. For example, psilocybin-assisted psychotherapy  
10  
11 demonstrated high success in smoking cessation outcomes at six months follow-up (abstinence  
12  
13 rates of 80%), with significant correlations found between psilocybin sessions and elevated  
14  
15 ratings of personal meaningfulness, wellbeing, and life satisfaction [49]. Randomized control  
16  
17 trials in the US and Switzerland have demonstrated significant long-term improvements among  
18  
19 patients with treatment-resistant PTSD following MDMA-assisted psychotherapy [50,51], and  
20  
21 similar research has commenced in Vancouver, Canada.  
22  
23  
24  
25  
26  
27  
28

29 Sex workers experience complex and synergistic effects between trauma, mental health  
30  
31 comorbidities, and risk for suicidality. Sex workers report high rates of childhood abuse [52–54],  
32  
33 which is associated with an increased likelihood of experiencing subsequent physical or sexual  
34  
35 violence, as well as initiating injection drug use [55–57]. For those suffering from emotional  
36  
37 trauma stemming from violence, including indirect violence (i.e., witnessing violence), there  
38  
39 may be a proclivity to use drugs for self-medication [58,59]. Violence and sexual coercion have  
40  
41 been found to be significantly associated with suicidality among sex worker populations in China  
42  
43 and India [8,9,15,60]. As demonstrated in this study, having an early traumatic life event is a key  
44  
45 risk factor for suicide among sex workers, a high proportion of whom are Indigenous, and  
46  
47 experiencing historical trauma can have harmful intergenerational impacts [1,16]. Given that  
48  
49 historical experiences of violence and trauma denote significant risk for suicide, there is an  
50  
51 urgent need to provide integrated, trauma-informed intervention services for sex workers and  
52  
53  
54  
55  
56  
57  
58  
59  
60

1  
2  
3 other marginalized populations. Currently available interventions and pharmacological  
4  
5 treatments for suicidality show limited efficacy, and concerted efforts should be made not only to  
6  
7 increase access to evidence-based treatments, but also to explore alternative approaches to  
8  
9 improving mental health and wellbeing. Emerging research and evidence show positive  
10  
11 outcomes with psychedelic-assisted treatments, which have demonstrated an excellent record of  
12  
13 safety with few to no serious adverse effects reported [20,22,30,61]. This study suggests  
14  
15  
16  
17  
18  
19  
20  
21  
22  
23  
24  
25  
26  
27  
28  
29  
30  
31  
32  
33  
34  
35  
36  
37  
38  
39  
40  
41  
42  
43  
44  
45  
46  
47  
48  
49  
50  
51  
52  
53  
54  
55  
56  
57  
58  
59  
60  
psychedelic substances may hold promise as useful tools in addressing mental health issues and  
remediating risks for psychological distress and suicide.

## CONCLUSION

The high rate of suicidality among sex workers identified in this study is a critical public health concern. In the context of emerging research and evidence on the therapeutic potential of psychedelics to treat mental health issues, our findings demonstrated that historical psychedelic use was independently associated with reduced suicidality among sex workers, while other drug use and childhood trauma increased the hazard for suicidality. This study supports calls for further research and innovative treatments and interventions to address and prevent suicide, including further investigation of the therapeutic utility of psychedelic drugs in treating mental illness and promoting mental wellness.



1  
2  
3  
4  
5  
6  
7  
8  
9  
10  
11  
12  
13  
**Acknowledgments:** We thank all those who contributed their time and expertise to this project, particularly participants, AESHA community advisory board members and partner agencies. We wish to acknowledge Chrissy Taylor, Jill Chettiar, Jennifer Morris, Tina Ok, Avery Alder, Emily Groundwater, Jane Li, Sylvia Machat, Lauren Martin McCraw, Minshu Mo, Chris Rzepa, Brittany Udall, Rachel Nicoletti, Emily Sarah Leake, Ray Croy, Natalie Blair, Anita Dhanoa, Emily Sollows, Nelly Gomez, Zoe Hassall, Bridget Simpson, Krista Butler, and Peter Vann for their research and administrative support.

14  
15  
16  
17  
18  
19  
20  
**Contributors:** EA and KS conceptualized and designed the study. EA, SAS, MB, and KS contributed to the interpretation and analysis of data. EA wrote the first draft of the manuscript. SAS, KT, MB, EW and KS contributed to reviewing and editing the manuscript. EA, SAS, KT, MB, EW and KS critically revised the manuscript and approved the final draft. KS is the guarantor.

21  
22  
23  
24  
25  
26  
27  
28  
29  
30  
**Funding:** This study was supported by the US National Institutes of Health (R01DA028648), the Canadian Institutes of Health Research (HHP-98835), and MacAIDS. KS is partially supported by a Canada Research Chair in Global Sexual Health and HIV/AIDS and the Michael Smith Foundation for Health Research. EA is supported by a Canadian Institutes of Health Research Doctoral Award. SAS is partially supported by a NIDA merit award (R37DA019829). EW is supported in part by a Tier 1 Canada Research Chair in Inner-City Medicine award. The study funders had no role in the study design, data collection, analysis, interpretation, writing of the report, or decision to submit the paper for publication.

31  
32  
33  
34  
35  
36  
37  
**Competing interests:** All authors have completed the ICMJE uniform disclosure form at [www.icmje.org/coi\\_disclosure.pdf](http://www.icmje.org/coi_disclosure.pdf) (available on request from the corresponding author) and declare: no support from any organisation for the submitted work; no financial relationships with any organisations that might have an interest in the submitted work in the previous three years; no other relationships or activities that could appear to have influenced the submitted work.

38  
39  
40  
41  
**Ethical approval:** This study holds ethical approval through Providence Health Care/University of British Columbia Research Ethics Board.

42  
43  
44  
45  
46  
**Transparency:** The study guarantor (KS) affirms that the manuscript is an honest, accurate, and transparent account of the study being reported; that no important aspects of the study have been omitted; and that any discrepancies with the study as planned have been explained.

47  
48  
49  
50  
51  
52  
53  
54  
55  
56  
57  
58  
59  
60  
**Data sharing:** no additional data available.

## REFERENCES

- 1 Hawton K, van Heeringen K. Suicide. *Lancet* 2009;**373**:1372–81.
- 2 World Health Organization. Preventing Suicide: A Global Imperative. Geneva, Switzerland: 2014. [http://www.who.int/mental\\_health/suicide-prevention/world\\_report\\_2014/en/](http://www.who.int/mental_health/suicide-prevention/world_report_2014/en/) (accessed Dec 2016).
- 3 Whiteford HA, Degenhardt L, Rehm J, *et al*. Global burden of disease attributable to mental and substance use disorders: Findings from the Global Burden of Disease Study 2010. *Lancet* 2013;**382**:1575–86.
- 4 Statistics Canada. Suicide Rates: An Overview. Ottawa: 2015. <http://www.statcan.gc.ca/pub/82-624-x/2012001/article/11696-eng.htm> (accessed Dec 2016).
- 5 Shannon K, Strathdee SA, Goldenberg SM, *et al*. Global epidemiology of HIV among female sex workers: Influence of structural determinants. *Lancet* 2015;**385**:55–71.
- 6 Argento E, Muldoon K, Duff P, *et al*. High prevalence and partner correlates of physical and sexual violence by intimate partners among street and off-street sex workers. *PLoS One* 2014;**9**:e102129.
- 7 Deering K, Amin A, Shoveller J, *et al*. A systematic review of the global magnitude and drivers of violence against sex workers. *Am J Public Health* 2014;**104**:e42–54.
- 8 Gu J, Lau JTF, Li M, *et al*. Socio-ecological factors associated with depression, suicidal ideation and suicidal attempt among female injection drug users who are sex workers in China. *Drug Alcohol Depend* 2014;**144**:102–10.
- 9 Zhang L, Li X, Wang B, *et al*. Violence, stigma and mental health among female sex workers in China: a structural equation modeling. *Women Health* 2016;**242**.
- 10 Roxburgh A, Degenhardt L, Copeland J. Posttraumatic stress disorder among female street-based sex workers in the greater Sydney area, Australia. *BMC Psychiatry* 2006;**6**:1–12.
- 11 Lau JTF, Tsui HY, Ho SPY, *et al*. Prevalence of psychological problems and relationships with condom use and HIV prevention behaviors among Chinese female sex workers in Hong Kong. *AIDS Care* 2010;**22**:659–68.
- 12 Surratt HL, Kurtz SP, Chen M, *et al*. HIV risk among female sex workers in Miami: the impact of violent victimization and untreated mental illness. *AIDS Care* 2012;**24**:553–61.
- 13 Hadland SE, Wood E, Dong H, *et al*. Suicide attempts and childhood maltreatment among street youth: A prospective cohort study. *Pediatrics* 2015;**136**:440–9.
- 14 Gilchrist G, Gruer L, Atkinson J. Comparison of drug use and psychiatric morbidity between prostitute and non-prostitute female drug users in Glasgow, Scotland. *Addict Behav* 2005;**30**:1019–23.
- 15 Shahmanesh M, Wayal S, Cowan F, *et al*. Suicidal behavior among female sex workers in Goa, India: The silent epidemic. *Am J Public Health* 2009;**99**:1239–46.
- 16 Bingham B, Leo D, Zhang R, *et al*. Generational sex work and HIV risk among Indigenous women in a street-based urban Canadian setting. *Cult. Health Sex.* 2014;**16**:440–52.
- 17 Benoit C, Carroll D, Chaudhry M. In search of a Healing Place: Aboriginal women in Vancouver's Downtown Eastside. *Soc Sci Med* 2003;**56**:821–33.
- 18 Li Z, Page A, Martin G, *et al*. Attributable risk of psychiatric and socio-economic factors for suicide from individual-level, population-based studies: A systematic review. *Soc Sci*

- 1  
2  
3  
4  
5  
6  
7  
8  
9  
10  
11  
12  
13  
14  
15  
16  
17  
18  
19  
20  
21  
22  
23  
24  
25  
26  
27  
28  
29  
30  
31  
32  
33  
34  
35  
36  
37  
38  
39  
40  
41  
42  
43  
44  
45  
46  
47  
48  
49  
50  
51  
52  
53  
54  
55  
56  
57  
58  
59  
60
- Med* 2011;**72**:608–16.
- 19 National Action Alliance for Suicide Prevention: Research Prioritization Task Force. A  
Prioritized Research Agenda for Suicide Prevention: An Action Plan to Save Lives.  
Rockville, MD: 2014. [www.suicide-research-agenda.org](http://www.suicide-research-agenda.org) (accessed Dec 2016).
- 20 Tupper KW, Wood E, Yensen R, *et al.* Psychedelic medicine: a re-emerging therapeutic  
paradigm. *Can Med Assoc J* 2015;**187**:1054–9.
- 21 Carhart-Harris RL, Leech R, Williams TM, *et al.* Implications for psychedelic-assisted  
psychotherapy: Functional magnetic resonance imaging study with psilocybin. *Br J*  
*Psychiatry* 2012;**200**:238–44.
- 22 dos Santos RG, Osorio FL, Crippa JAS, *et al.* Antidepressive, anxiolytic, and antiaddictive  
effects of ayahuasca, psilocybin and lysergic acid diethylamide (LSD): a systematic  
review of clinical trials published in the last 25 years: antidepressive effects of ayahuasca,  
psilocybin and LSD. *Ther Adv Psychopharmacol* Published Online First: 2016.  
doi:10.1177/2045125316638008
- 23 Sessa B. Shaping the renaissance of psychedelic research. *Lancet* 2012;**380**:200–1.
- 24 Sessa B, Johnson MW. Can psychedelic compounds play a part in drug dependence  
therapy? *Br J Psychiatry* 2015;**206**:1–3.
- 25 Hendricks PS, Clark CB, Johnson MW, *et al.* Hallucinogen use predicts reduced  
recidivism among substance-involved offenders under community corrections supervision.  
*J Psychopharmacol* 2014;**28**:62–6.
- 26 Walsh Z, Hendricks PS, Smith S, *et al.* Hallucinogen use and intimate partner violence:  
Prospective evidence consistent with protective effects among men with histories of  
problematic substance use. *J Psychopharmacol* Published Online First: 2016.  
doi:10.1177/0269881116642538
- 27 Hendricks PS, Thorne CB, Clark CB, *et al.* Classic psychedelic use is associated with  
reduced psychological distress and suicidality in the United States adult population. *J*  
*Psychopharmacol* 2015;**29**:280–8.
- 28 Krebs TS, Johansen P-Ø. Psychedelics and mental health: a population study. *PLoS One*  
2013;**8**:e63972. doi:10.1371/journal.pone.0063972
- 29 Johansen P-Ø, Krebs TS. Psychedelics not linked to mental health problems or suicidal  
behavior: A population study. *J Psychopharmacol* 2015;**29**:270–9.
- 30 Carhart-Harris RL, Bolstridge M, Rucker J, *et al.* Psilocybin with psychological support  
for treatment-resistant depression: An open-label feasibility study. *The Lancet Psychiatry*  
2016;**3**:619–27.
- 31 Carhart-Harris RL, Kaelen M, Bolstridge M, *et al.* The paradoxical psychological effects  
of lysergic acid diethylamide (LSD). *Psychol Med* 2016;:1–12.  
doi:10.1017/S0033291715002901
- 32 Sanches R, de Lima Osorio F, dos Santos R, *et al.* Antidepressant effects of a single dose  
of ayahuasca in patients with recurrent depression: A SPECT study. *J Clin*  
*Psychopharmacol* 2016;**36**:77–81.
- 33 Kraehenmann R, Preller KH, Scheidegger M, *et al.* Psilocybin-induced decrease in  
amygdala reactivity correlates with enhanced positive mood in healthy volunteers. *Biol*  
*Psychiatry* 2015;**78**:572–81.
- 34 Grob CS, Danforth AL, Chopra GS, *et al.* Pilot study of psilocybin treatment for anxiety  
in patients with advanced-stage cancer. *Arch Gen Psychiatry* 2011;**68**:71–8.
- 35 Griffiths RR, Johnson MW, Richards WA, *et al.* Psilocybin occasioned mystical-type

- 1  
2  
3  
4 experiences: Immediate and persisting dose-related effects. *Psychopharmacology (Berl)*  
5 2011;**218**:649–65.  
6  
7 36 Roxburgh A, Degenhardt L, Copeland J, *et al.* Drug dependence and associated risks  
8 among female street-based sex workers in the Greater Sydney Area. Australia. *Subst Use*  
9 *Misuse* 2008;**43**:1202–17.  
10  
11 37 Hong Y, Zhang C, Li X, *et al.* Partner violence and psychosocial distress among female  
12 sex workers in China. *PLoS One* 2013;**8**:e62290. doi:10.1371/journal.pone.0062290  
13  
14 38 Dyck E. LSD: A new treatment emerging from the past. *Can Med Assoc J*  
15 2015;**187**:1079–80.  
16  
17 39 Bogenschutz MP, Johnson MW. Classic hallucinogens in the treatment of addictions.  
18 *Prog Neuro-Psychopharmacology Biol Psychiatry* 2015;**64**:250–8.  
19  
20 40 Jung M. Associations of physical and sexual health with suicide attempts among female  
21 sex workers in South Korea. *Sex Disabil* 2013;**31**:275–86.  
22  
23 41 Nemoto T, Boedeker B, Iwamoto M. Social support, exposure to violence and  
24 transphobia, and correlates of depression among male-to-female transgender women with  
25 a history of sex work. *Am J Public Health* 2011;**101**:1980–8.  
26  
27 42 Anisman H, Du L, Palkovits M, *et al.* Serotonin receptor subtype and p11 mRNA  
28 expression in stress-relevant brain regions of suicide and control subjects. *J Psychiatry*  
29 *Neurosci* 2008;**33**:131–41.  
30  
31 43 Carhart-Harris RL, Leech R, Hellyer PJ, *et al.* The entropic brain: a theory of conscious  
32 states informed by neuroimaging research with psychedelic drugs. *Front Hum Neurosci*  
33 2014;**8**. doi:10.3389/fnhum.2014.00020  
34  
35 44 Carhart-Harris RL, Erritzoe D, Williams T, *et al.* Neural correlates of the psychedelic state  
36 as determined by fMRI studies with psilocybin. *Proc Natl Acad Sci U S A*  
37 2012;**109**:2138–43.  
38  
39 45 Osório FL, Sanches RF, Macedo LR, *et al.* Antidepressant effects of a single dose of  
40 ayahuasca in patients with recurrent depression: a preliminary report. *Rev Bras Psiquiatr*  
41 2016;**37**:13–20.  
42  
43 46 Gasser P, Holstein D, Michel Y, *et al.* Safety and efficacy of lysergic acid diethylamide-  
44 assisted psychotherapy for anxiety associated with life-threatening diseases. *J Nerv Ment*  
45 *Dis* 2014;**202**:513–20.  
46  
47 47 Griffiths RR, Richards WA, McCann U, *et al.* Psilocybin can occasion mystical-type  
48 experiences having substantial and sustained personal meaning and spiritual significance.  
49 *Psychopharmacology (Berl)* 2006;**187**:268–83.  
50  
51 48 Bouso JC, Palhano-Fontes F, Rodriguez-Fornells A, *et al.* Long-term use of psychedelic  
52 drugs is associated with differences in brain structure and personality in humans. *Eur*  
53 *Neuropsychopharmacol* 2015;**25**:483–92.  
54  
55 49 Johnson MW, Garcia-Romeu A, Cosimano MP, *et al.* Pilot study of the 5-HT<sub>2A</sub>R agonist  
56 psilocybin in the treatment of tobacco addiction. *J Psychopharmacol* 2014;**28**:983–92.  
57  
58 50 Mithoefer MC, Wagner MT, Mithoefer AT, *et al.* Durability of improvement in post-  
59 traumatic stress disorder symptoms and absence of harmful effects or drug dependency  
60 after 3,4-methylenedioxymethamphetamine-assisted psychotherapy: a prospective long-  
term follow-up study. *J Psychopharmacol* 2013;**27**:28–39.  
51  
52 51 Oehen P, Schnyder U. A randomized, controlled pilot study of MDMA ( $\pm$  3,4  
53 methylenedioxymethamphetamine)-assisted psychotherapy for treatment of resistant,  
54 chronic Post-Traumatic Stress Disorder (PTSD). *J Psychopharmacol* 2013;**27**:40–52.

- 1  
2  
3 52 Rio Navarro J, Cohen J, Rocillo Arechaga E, *et al.* Physical and sexual violence, mental  
4 health indicators, and treatment seeking among street-based population groups in  
5 Tegucigalpa, Honduras. *Pan Am J Public Heal* 2012;**31**:388–95.
- 6  
7 53 Stolz J-A, Shannon K, Kerr T, *et al.* Associations between childhood maltreatment and  
8 sex work in a cohort of drug-using youth. *Soc Sci Med* 2007;**65**:1214–21.
- 9  
10 54 Argento E, Chettiar J, Nguyen P, *et al.* Prevalence and correlates of nonmedical  
11 prescription opioid use among a cohort of sex workers in Vancouver, Canada. *Int J Drug*  
12 *Policy* 2015;**26**:59–66.
- 13  
14 55 Kerr T, Stoltz J, Marshall BDL, *et al.* Childhood Trauma and Injection Drug Use among  
15 High-Risk Youth. *J Adolesc Heal* 2009;**45**:300–2.
- 16  
17 56 Ulibarri MD, Strathdee S a, Lozada R, *et al.* Intimate partner violence among female sex  
18 workers in two Mexico-U.S. border cities: partner characteristics and HIV risk-behaviors  
19 as correlates of abuse. *Psychol Trauma Theory, Res Pract Policy* 2010;**2**:318–25.
- 20  
21 57 Argento E, Strathdee S, Goldenberg S, *et al.* Violence, trauma and living with HIV:  
22 Longitudinal predictors of initiating crystal methamphetamine injection among sex  
23 workers. *Drug Alcohol Depend* 2016 (submitted).
- 24  
25 58 Tull MT, Gratz KL, Aklin WM, *et al.* A preliminary examination of the relationships  
26 between posttraumatic stress symptoms and crack/cocaine, heroin, and alcohol  
27 dependence. *J Anxiety Disord* 2010;**24**:55–62.
- 28  
29 59 Romero-Daza N, Weeks M, Singer M. Conceptualizing the impact of indirect violence on  
30 HIV risk among women involved in street-level prostitution. *Aggress Violent Behav*  
31 2005;**10**:153–70.
- 32  
33 60 Wang B, Li X, Stanton B, *et al.* Sexual coercion, HIV-related risk, and mental health  
34 among female sex workers in China. *Health Care Women Int* 2007;**28**:745–62.
- 35  
36 61 Morgan CJA, Muetzelfeldt L, Muetzelfeldt M, *et al.* Harms associated with psychoactive  
37 substances: findings of the UK National Drug Survey. *J Psychopharmacol* 2010;**24**:147–  
38 53.
- 39  
40  
41  
42  
43  
44  
45  
46  
47  
48  
49  
50  
51  
52  
53  
54  
55  
56  
57  
58  
59  
60

**Table 1: Baseline characteristics of sex workers in Vancouver who thought about or attempted suicide over follow-up, compared to those who did not (N=290)**

| Characteristics                                         | Suicidality<br>n=31 (11%) | No Suicidality<br>n=259 (89%) | p-value |
|---------------------------------------------------------|---------------------------|-------------------------------|---------|
| Age (median, IQR)                                       | 34 (27 to 47)             | 36 (29 to 42)                 | 0.767   |
| Gender/sexual minority                                  | 7 (22.6)                  | 38 (14.7)                     | 0.291   |
| Born in Canada                                          | 29 (93.6)                 | 156 (60.2)                    | <0.001  |
| Indigenous ancestry                                     | 18 (58.1)                 | 75 (29.0)                     | 0.001   |
| Education, high school or greater                       | 10 (32.3)                 | 142 (54.8)                    | 0.017   |
| HIV seropositivity <sup>†</sup>                         | 7 (22.6)                  | 26 (10.0)                     | 0.065   |
| STI seropositivity <sup>†</sup>                         | 3 (9.7)                   | 35 (13.5)                     | 0.778   |
| Homelessness <sup>†</sup>                               | 10 (32.3)                 | 63 (24.3)                     | 0.336   |
| Psychedelic use                                         | 8 (25.8)                  | 71 (27.4)                     | 0.849   |
| Marijuana use                                           | 27 (87.1)                 | 152 (58.7)                    | 0.002   |
| Prescription opioid use                                 | 12 (38.7)                 | 77 (29.7)                     | 0.306   |
| Crack use                                               | 27 (87.1)                 | 157 (60.6)                    | 0.004   |
| Cocaine use                                             | 25 (80.7)                 | 137 (52.9)                    | 0.003   |
| Crystal meth use                                        | 18 (58.1)                 | 72 (27.8)                     | <0.001  |
| Heroin use                                              | 21 (67.7)                 | 120 (46.3)                    | 0.024   |
| Non-injection drug use <sup>†</sup>                     | 27 (87.1)                 | 148 (57.1)                    | 0.001   |
| Injection drug use <sup>†</sup>                         | 16 (51.6)                 | 81 (31.3)                     | 0.023   |
| Physical/sexual client violence <sup>†</sup>            | 5 (16.1)                  | 36 (13.9)                     | 0.784   |
| Physical/sexual childhood abuse                         | 24 (77.4)                 | 112 (43.2)                    | <0.001  |
| Police harassment/arrest <sup>†</sup>                   | 16 (51.6)                 | 91 (35.1)                     | 0.072   |
| <i>Primary place to solicit clients<sup>†</sup></i>     |                           |                               |         |
| Street/public space                                     | 24 (77.4)                 | 118 (45.6)                    | 0.002   |
| Indoor/in-call venue                                    | 3 (9.7)                   | 103 (39.8)                    | -       |
| Independent/self-advertising (e.g., newspapers, online) | 4 (12.9)                  | 38 (14.7)                     | -       |

<sup>†</sup> In the last 6 months

**Table 2: Unadjusted and adjusted hazard ratios for predictors of time to suicidality among sex workers in Vancouver, 2010-2014 (N=290)**

| Characteristics                                     | Unadjusted Hazard Ratio (95%CI) | p-value | Adjusted Hazard Ratio (95%CI) | p-value |
|-----------------------------------------------------|---------------------------------|---------|-------------------------------|---------|
| Psychedelic use                                     | 1.00 (0.45 to 2.23)             | 0.995   | 0.40 (0.17 to 0.94)           | 0.036   |
| Marijuana use                                       | 3.44 (1.21 to 9.79)             | 0.021   | -                             | -       |
| Prescription opioid use                             | 1.88 (0.91 to 3.90)             | 0.089   | -                             | -       |
| Crack use                                           | 3.06 (1.07 to 8.74)             | 0.037   | -                             | -       |
| Cocaine use                                         | 2.53 (1.03 to 6.22)             | 0.043   | -                             | -       |
| Crystal meth use                                    | 3.73 (1.75 to 7.97)             | <0.001  | 3.25 (1.47 to 7.21)           | 0.004   |
| Heroin use                                          | 2.26 (0.99 to 5.13)             | 0.053   | -                             | -       |
| HIV seropositivity <sup>†</sup>                     | 2.15 (0.92 to 5.06)             | 0.078   | -                             | -       |
| Childhood abuse                                     | 3.92 (1.69 to 9.09)             | 0.002   | 3.54 (1.49 to 8.40)           | 0.004   |
| Indigenous ancestry                                 | 2.76 (1.34 to 5.67)             | 0.006   | -                             | -       |
| Canadian born                                       | 6.72 (1.62 to 27.95)            | 0.009   | -                             | -       |
| Homelessness <sup>†</sup>                           | 2.55 (1.19 to 5.44)             | 0.016   | 1.95 (0.91 to 4.17)           | 0.085   |
| <i>Primary place to solicit clients<sup>†</sup></i> |                                 |         |                               |         |
| Indoor venue (vs. street)                           | 0.19 (0.06 to 0.66)             | 0.009   | -                             | -       |
| Independent (vs. street)                            | 0.38 (0.14 to 1.05)             | 0.061   | -                             | -       |

<sup>†</sup> In the last 6 months

STROBE 2007 (v4) Statement—Checklist of items that should be included in reports of *cohort studies*

| Section/Topic                | Item # | Recommendation                                                                                                                                                                       | Reported on page # |
|------------------------------|--------|--------------------------------------------------------------------------------------------------------------------------------------------------------------------------------------|--------------------|
| Title and abstract           | 1      | (a) Indicate the study's design with a commonly used term in the title or the abstract                                                                                               | Title page, 1      |
|                              |        | (b) Provide in the abstract an informative and balanced summary of what was done and what was found                                                                                  | 1                  |
| <b>Introduction</b>          |        |                                                                                                                                                                                      |                    |
| Background/rationale         | 2      | Explain the scientific background and rationale for the investigation being reported                                                                                                 | 3, 4               |
| Objectives                   | 3      | State specific objectives, including any prespecified hypotheses                                                                                                                     | 4, 5               |
| <b>Methods</b>               |        |                                                                                                                                                                                      |                    |
| Study design                 | 4      | Present key elements of study design early in the paper                                                                                                                              | 5, 6               |
| Setting                      | 5      | Describe the setting, locations, and relevant dates, including periods of recruitment, exposure, follow-up, and data collection                                                      | 5, 6               |
| Participants                 | 6      | (a) Give the eligibility criteria, and the sources and methods of selection of participants. Describe methods of follow-up                                                           | 5                  |
|                              |        | (b) For matched studies, give matching criteria and number of exposed and unexposed                                                                                                  | n/a                |
| Variables                    | 7      | Clearly define all outcomes, exposures, predictors, potential confounders, and effect modifiers. Give diagnostic criteria, if applicable                                             | 6, 7               |
| Data sources/<br>measurement | 8*     | For each variable of interest, give sources of data and details of methods of assessment (measurement). Describe comparability of assessment methods if there is more than one group | 5-7                |
| Bias                         | 9      | Describe any efforts to address potential sources of bias                                                                                                                            | 5, 10              |
| Study size                   | 10     | Explain how the study size was arrived at                                                                                                                                            | 6, 7               |
| Quantitative variables       | 11     | Explain how quantitative variables were handled in the analyses. If applicable, describe which groupings were chosen and why                                                         | 6, 7               |
| Statistical methods          | 12     | (a) Describe all statistical methods, including those used to control for confounding                                                                                                | 6, 7               |
|                              |        | (b) Describe any methods used to examine subgroups and interactions                                                                                                                  | 7                  |
|                              |        | (c) Explain how missing data were addressed                                                                                                                                          | 7                  |
|                              |        | (d) If applicable, explain how loss to follow-up was addressed                                                                                                                       | 7                  |
|                              |        | (e) Describe any sensitivity analyses                                                                                                                                                | n/a                |
| <b>Results</b>               |        |                                                                                                                                                                                      |                    |



|                          |     |                                                                                                                                                                                                              |             |
|--------------------------|-----|--------------------------------------------------------------------------------------------------------------------------------------------------------------------------------------------------------------|-------------|
| Participants             | 13* | (a) Report numbers of individuals at each stage of study—eg numbers potentially eligible, examined for eligibility, confirmed eligible, included in the study, completing follow-up, and analysed            | 7, 8        |
|                          |     | (b) Give reasons for non-participation at each stage                                                                                                                                                         | 6, 7        |
|                          |     | (c) Consider use of a flow diagram                                                                                                                                                                           |             |
| Descriptive data         | 14* | (a) Give characteristics of study participants (eg demographic, clinical, social) and information on exposures and potential confounders                                                                     | 7-9, 19, 20 |
|                          |     | (b) Indicate number of participants with missing data for each variable of interest                                                                                                                          | 7, 8        |
|                          |     | (c) Summarise follow-up time (eg, average and total amount)                                                                                                                                                  | 8           |
| Outcome data             | 15* | Report numbers of outcome events or summary measures over time                                                                                                                                               | 8           |
| Main results             | 16  | (a) Give unadjusted estimates and, if applicable, confounder-adjusted estimates and their precision (eg, 95% confidence interval). Make clear which confounders were adjusted for and why they were included | 9, 20, 7    |
|                          |     | (b) Report category boundaries when continuous variables were categorized                                                                                                                                    | n/a         |
|                          |     | (c) If relevant, consider translating estimates of relative risk into absolute risk for a meaningful time period                                                                                             | n/a         |
| Other analyses           | 17  | Report other analyses done—eg analyses of subgroups and interactions, and sensitivity analyses                                                                                                               | n/a         |
| <b>Discussion</b>        |     |                                                                                                                                                                                                              |             |
| Key results              | 18  | Summarise key results with reference to study objectives                                                                                                                                                     | 9           |
| <b>Limitations</b>       |     |                                                                                                                                                                                                              |             |
| Interpretation           | 20  | Give a cautious overall interpretation of results considering objectives, limitations, multiplicity of analyses, results from similar studies, and other relevant evidence                                   | 9, 10       |
| Generalisability         | 21  | Discuss the generalisability (external validity) of the study results                                                                                                                                        | 10          |
| <b>Other information</b> |     |                                                                                                                                                                                                              |             |
| Funding                  | 22  | Give the source of funding and the role of the funders for the present study and, if applicable, for the original study on which the present article is based                                                | 14          |

\*Give information separately for cases and controls in case-control studies and, if applicable, for exposed and unexposed groups in cohort and cross-sectional studies.

**Note:** An Explanation and Elaboration article discusses each checklist item and gives methodological background and published examples of transparent reporting. The STROBE checklist is best used in conjunction with this article (freely available on the Web sites of PLoS Medicine at <http://www.plosmedicine.org/>, Annals of Internal Medicine at <http://www.annals.org/>, and Epidemiology at <http://www.epidem.com/>). Information on the STROBE Initiative is available at [www.strobe-statement.org](http://www.strobe-statement.org).

# BMJ Open

## Does psychedelic drug use reduce risk of suicidality? Evidence from a longitudinal community-based cohort of marginalized women in a Canadian setting

|                                 |                                                                                                                                                                                                                                                                                                                                                                                                                                                                                                                                                                                    |
|---------------------------------|------------------------------------------------------------------------------------------------------------------------------------------------------------------------------------------------------------------------------------------------------------------------------------------------------------------------------------------------------------------------------------------------------------------------------------------------------------------------------------------------------------------------------------------------------------------------------------|
| Journal:                        | <i>BMJ Open</i>                                                                                                                                                                                                                                                                                                                                                                                                                                                                                                                                                                    |
| Manuscript ID                   | bmjopen-2017-016025.R1                                                                                                                                                                                                                                                                                                                                                                                                                                                                                                                                                             |
| Article Type:                   | Research                                                                                                                                                                                                                                                                                                                                                                                                                                                                                                                                                                           |
| Date Submitted by the Author:   | 13-Jun-2017                                                                                                                                                                                                                                                                                                                                                                                                                                                                                                                                                                        |
| Complete List of Authors:       | Argento, Elena; BC Centre for Excellence in HIV/AIDS; University of British Columbia, Interdisciplinary Studies<br>Strathdee, Steffanie; University of California San Diego, Medicine<br>Tupper, Kenneth; University of British Columbia, School of Population and Public Health<br>Braschel, Melissa; BC Centre for Excellence in HIV/AIDS, Gender and Sexual Health Initiative<br>Wood, Evan; BC Centre for Excellence in HIV/AIDS<br>Shannon, Kate; British Columbia Centre for Excellence in HIV/AIDS; University of British Columbia, Division of AIDS Department of Medicine |
| <b>Primary Subject Heading</b>: | Public health                                                                                                                                                                                                                                                                                                                                                                                                                                                                                                                                                                      |
| Secondary Subject Heading:      | Evidence based practice, Epidemiology, Mental health                                                                                                                                                                                                                                                                                                                                                                                                                                                                                                                               |
| Keywords:                       | sex workers, psychedelics, hallucinogens, MENTAL HEALTH, Suicide & self-harm < PSYCHIATRY                                                                                                                                                                                                                                                                                                                                                                                                                                                                                          |
|                                 |                                                                                                                                                                                                                                                                                                                                                                                                                                                                                                                                                                                    |

SCHOLARONE™  
Manuscripts

1  
2  
3  
4  
5  
6  
7  
8  
9  
10  
11  
12  
13  
14  
15  
16  
17  
18  
19  
20  
21  
22  
23  
24  
25  
26  
27  
28  
29  
30  
31  
32  
33  
34  
35  
36

## Does psychedelic drug use reduce risk of suicidality? Evidence from a longitudinal community-based cohort of marginalized women in a Canadian setting

Elena Argento, *PhD student*<sup>1,2</sup>, Steffanie A. Strathdee, *associate dean*<sup>3</sup>, Kenneth Tupper, *adjunct professor*<sup>4,5</sup>, Melissa Braschel, *statistician*<sup>1</sup>, Evan Wood, *professor*<sup>4,5</sup>, Kate Shannon, *associate professor*<sup>1,4</sup>

- 1) Gender and Sexual Health Initiative, St. Paul's Hospital, 608-1081 Burrard Street, Vancouver, BC, Canada V6Z 1Y6
- 2) Interdisciplinary Studies Graduate Program, University of British Columbia, 2357 Main Mall, Vancouver, BC, Canada V6T 1Z4
- 3) Department of Medicine, University of California San Diego, 9500 Gilman Drive, La Jolla, CA, USA 92093-0507
- 4) Faculty of Medicine, University of British Columbia, 2206 East Mall, Vancouver, BC, Canada V6T 1Z9
- 5) BC Centre on Substance Use, St. Paul's Hospital, 608-1081 Burrard Street, Vancouver, BC, Canada V6Z 1Y6

37  
38  
39  
40  
41  
42  
43  
44  
45  
46  
47  
48  
49  
50  
51  
52  
53  
54  
55  
56  
57  
58  
59  
60

**Send correspondence to:** **Kate Shannon, PhD, MPH**  
Associate Professor, Department of Medicine  
University of British Columbia  
Director, Gender and Sexual Health Initiative  
B.C. Centre for Excellence in HIV/AIDS  
St. Paul's Hospital, 608-1081 Burrard Street, Vancouver, B.C.,  
V6Z 1Y6, Canada  
**Tel:** (604) 804-9459  
**Fax:** (604) 806-9044  
**Email:** [gshi@cfenet.ubc.ca](mailto:gshi@cfenet.ubc.ca)

Word Count: 3197

## ABSTRACT

**Objective:** This study aimed to longitudinally investigate whether ever having used a psychedelic drug can have a protective effect on incidence of suicidality among marginalized women.

**Design:** Longitudinal community-based cohort study.

**Setting:** Data were drawn from a prospective, community-based cohort of marginalized women in Metro Vancouver, Canada.

**Participants:** 766 women completed the baseline questionnaire between January 2010 and August 2014. Participants who did not report suicidality at baseline and who completed at least one follow-up visit were included.

**Main outcome measure:** Extended Cox regression was used to model predictors of new suicidality (suicide ideation or attempts) over 54 months follow-up.

**Results:** Nearly half (46%; n=355) of participants reported prior suicidality and were thus excluded from the present analyses. Of 290 women eligible at baseline, 11% (n=31) reported recent suicidality during follow-up, with an incidence density of 4.42 per 100 person-years (95% Confidence Interval [CI] 3.10 to 6.30). In multivariable analysis, reported lifetime psychedelic drug use was associated with a 60% reduced hazard for suicidality (Adjusted Hazard Ratio [AHR] 0.40; 95%CI 0.17 to 0.94). Crystal methamphetamine use (AHR 3.25; 95%CI 1.47 to 7.21) and childhood abuse (AHR 3.54; 95%CI 1.49 to 8.40) remained independent predictors of suicidality.

**Conclusion:** The high rate of suicidality identified in this study is of major concern. Alongside emerging evidence on the potential of psychedelic-assisted therapy to treat some mental illness and addiction issues, our findings demonstrate that naturalistic psychedelic drug use is independently associated with reduced suicidality, while other illicit drug use and childhood trauma predispose women to suicidality. While observational, this study supports calls for further investigation of the therapeutic utility of psychedelic drugs in treating mental illness and promoting mental wellness.

**Word Count:** 277

**Keywords:** *women, psychedelics, hallucinogens, suicide prevention, mental health, substance use*

### Strengths and limitations of this study

- This is the first study to longitudinally investigate the potential protective effect of psychedelic drug use on suicidality, drawing from a large, community-based cohort of marginalized women.
- Multivariable Cox regression analyses were used to examine the impact of lifetime psychedelic drug use on incidence of suicidality among a marginalized population.
- The associations between specific psychedelics, contexts of their use, and suicidality were not explored in this study.
- Not all potential confounding variables could be controlled for in this study and the associations uncovered cannot be determined as causal.
- Data were self-reported and variables examined included highly stigmatized topics, introducing the potential for recall bias, social desirability and reporting bias.

## INTRODUCTION

Despite efforts to improve mental health over the last 60 years, suicide remains a critical public health concern worldwide [1,2]. Suicide was the second leading cause of death globally in 2012 among 15-29 year olds [2], with an estimated 80-90% of suicide deaths attributable to mental health or substance use disorders [3,4]. Significant gaps remain in empirical research examining suicidality among marginalized populations. Marginalized women, such as sex workers who are street-involved or use drugs, experience disproportionately high levels of social and health-related risks and harms, including stigma, discrimination, and violence [5–7] as a result of dynamic structural drivers including poverty, criminalization, and racism. While sex workers are a diverse population working from indoor in-call and out-call venues to street-based settings, previous studies highlight substantial unmet mental health needs of more marginalized and street-involved sex workers. Studies among street-based sex workers and those who use drugs underscore the associations of social exclusion, depression, and post-traumatic stress disorder (PTSD) with suicidality [8–12]. Research demonstrates greater risk for suicidality among those with a history of trauma [1,13,14] and among women sex workers who report historical experiences of violence and childhood abuse [8–10,15,16]. Further, Indigenous women are vastly overrepresented among street-based sex workers in North America, and face devastating and multigenerational effects of trauma and socio-economic dislocation (e.g., high burden of mental illness and suicidality) as a result of colonialism, racialized policies, and displacement from land and home communities [17,18].

Various biological, interpersonal, and socio-structural factors (e.g., social exclusion/isolation, education level, employment) contribute to our understanding of suicidal behaviors [1,19]. While

1  
2  
3 evidence has demonstrated that some forms of cognitive behavioral therapy and pharmacological  
4 interventions may reduce suicidality, the literature is hampered by publication bias and  
5 significant heterogeneity of strategies and outcome measures [14,20]. There remains an urgency  
6 to better understand pathways to suicidality, with data highlighting the need for tailored  
7 intervention approaches for key marginalized populations [20,21]. Given the complex etiological  
8 pathways to suicide and limited effectiveness of well-established evidence-based interventions to  
9 reduce the burden of suicidality, the US National Institute of Mental Health has called for  
10 innovative research on suicide prevention and treatment for suicidality [22].  
11  
12  
13  
14  
15  
16  
17  
18  
19  
20  
21  
22  
23

24 A number of psychedelic drug therapies are being revisited following a 40-year hiatus in  
25 research into their potential for the treatment of depression, anxiety, PTSD, eating disorders, and  
26 addiction [23]. Psychedelic drugs include the classic serotonergic psychedelics or  
27 “hallucinogens” lysergic acid diethylamide (LSD), psilocybin, dimethyltryptamine (DMT), and  
28 mescaline, as well as the “enactogen” or “empathogen” methylenedioxymethamphetamine  
29 (MDMA) [23–25], all of which are being investigated in clinical/pre-clinical studies for their  
30 neuropharmacological functions and potential as adjuncts to psychotherapy [26–28]. While  
31 renewed interest in psychedelic medicine is challenged by various funding, methodological, and  
32 legal impediments, the emerging evidence indicating improved outcomes for some individuals  
33 suffering from mental health and addiction issues has generated new scientific inquiry and an  
34 imposing obligation to advance this research [23,29,30]. Recent observational studies in the US  
35 demonstrate significant associations between lifetime psychedelic use and reduced recidivism  
36 and intimate partner violence among populations of prison inmates [31,32], and reduced  
37 psychological distress and suicidality among the general adult population [33–35].  
38  
39  
40  
41  
42  
43  
44  
45  
46  
47  
48  
49  
50  
51  
52  
53  
54  
55  
56  
57  
58  
59  
60

1  
2  
3  
4  
5  
6 Despite the multifaceted vulnerabilities experienced by marginalized sex workers, there remains  
7  
8 a paucity of data on suicide rates and research that systematically examines factors that  
9  
10 potentiate or mitigate suicidality among sex workers, particularly in the global north. Some  
11  
12 evidence suggests that psychedelic drug use may be protective with regard to suicidality [33–35]  
13  
14 and is associated with significant improvements in psychological wellbeing and reductions in  
15  
16 depression and anxiety in clinical settings [36–41], yet existent research is characterized by large  
17  
18 gaps. Given the urgency of addressing and preventing suicide and calls for prioritizing  
19  
20 innovative interventions, this study aimed to longitudinally investigate whether lifetime  
21  
22 psychedelic drug use is associated with a reduced incidence of suicidality (suicide ideation or  
23  
24 attempts) among a cohort of marginalized women. We postulated that psychedelic drug use  
25  
26 would have an independent protective effect on suicidality over the study period.  
27  
28  
29  
30  
31  
32  
33

## 34 **METHODS**

### 36 **Study Design and Participants**

37  
38 Data for this study were drawn from a large, community-based, prospective cohort of women sex  
39  
40 workers initiated in 2010, known as AESHA (An Evaluation of Sex Workers Health Access).  
41  
42 Eligibility criteria for study participants included cisgender or transgender women, 14 years of  
43  
44 age or older, who exchanged sex for money within the last 30 days. AESHA participants  
45  
46 completed interviewer-administered questionnaires and HIV/STI/HCV serology testing at  
47  
48 enrollment and biannually. Interview, outreach and nursing staff included experiential  
49  
50 individuals (current/former sex workers) with substantial community experience. Participants  
51  
52 were recruited across Metro Vancouver using time-location sampling and community mapping  
53  
54  
55  
56  
57  
58  
59  
60



1  
2  
3 strategies, with day and late-night outreach to outdoor sex work locations (i.e., streets,  
4 alleyways), indoor sex work venues (i.e., massage parlors, micro-brothels, and in-call locations),  
5  
6 and online. Weekly outreach is conducted to over 100 sex work venues by outreach/nursing  
7  
8 teams operating a mobile van, with regular contact as well as encouraging drop-in to women-  
9  
10 only spaces at the research office, contributing to an annual retention rate of >90% for AESHA  
11  
12 participants.  
13  
14  
15  
16  
17  
18  
19

20 The main interview questionnaire elicits responses related to socio-demographics (e.g., sexual  
21 identity, ethnicity, housing), the work environment (e.g., access to services, violence/safety,  
22  
23 policing, incarceration), client characteristics (e.g., types/fees of services, condom use), intimate  
24  
25 partners (e.g., sexual history, cohabitation, financial support), trauma and violence (e.g., lifetime  
26  
27 and childhood trauma, exposure to intimate partner and workplace violence), and comprehensive  
28  
29 injection and non-injection drug use patterns. The clinical questionnaire relates to overall  
30  
31 physical, mental, and emotional health, and HIV testing and treatment experiences to support  
32  
33 education, referral, and linkages with care. The research team works in close partnership with the  
34  
35 affected community and a diversity of stakeholders (e.g., legal/human rights experts,  
36  
37 community-based organizations, service providers, health authorities, government officials, and  
38  
39 international policy bodies) and regularly engages in knowledge exchange efforts. AESHA is  
40  
41 monitored by a Community Advisory Board of over 15 sex work, women's health and HIV  
42  
43 service agencies, as well as representatives from the health authority and policy experts, and  
44  
45 holds ethical approval through Providence Health Care/University of British Columbia Research  
46  
47 Ethics Board. All participants receive an honorarium of \$40 CAD at each bi-annual visit for their  
48  
49 time, expertise and travel.  
50  
51  
52  
53  
54  
55  
56  
57  
58  
59  
60

1  
2  
3  
4  
5  
6 Analyses for this study were restricted to AESHA participants who had never thought about or  
7  
8 attempted suicide at baseline and completed at least one follow-up visit between January 2010  
9  
10 and August 2014. Those with missing observations for suicidality at baseline (n=50/766; 6.5%)  
11  
12 were excluded from analysis, and one additional participant was excluded because reported  
13  
14 suicidality was missing at follow-up.  
15  
16

### 17 18 19 20 **Statistical Analyses**

21  
22 The outcome of interest was a first episode of suicidality, defined as responding 'yes' to having  
23  
24 thought about or attempted suicide in the last six months. Time-fixed variables examined  
25  
26 included age (continuous), gender/sexual minority (lesbian, gay, bisexual, trans, or two-spirit),  
27  
28 Indigenous ancestry (inclusive of First Nations, Métis, and Inuit), being an im/migrant worker  
29  
30 (versus Canadian born), education (high school or greater), and physical and/or sexual childhood  
31  
32 abuse (before age 18). Variables treated as time-updated covariates based on bi-annual follow-up  
33  
34 data included HIV/STI serostatus, recent homelessness, recent physical and/or sexual violence  
35  
36 by clients, recent police harassment and/or arrest, and primary place to solicit clients. Time-  
37  
38 updated injection and non-injection drug use variables included lifetime use of psychedelics  
39  
40 (including LSD/acid, magic mushrooms/psilocybin, ecstasy/MDMA), cannabis, pharmaceutical  
41  
42 opioids (any street methadone/suboxone, dilaudid, morphine, oxycontin,  
43  
44 percocet/vicodin/demerol, or T3s/T4s), crack, cocaine, crystal methamphetamine, and heroin.  
45  
46  
47  
48  
49

50  
51  
52  
53 Using extended Cox regression, unadjusted and adjusted hazard ratios (HR and AHR) and 95%  
54  
55 confidence intervals (CI) were calculated to identify predictors of suicidality. Variables  
56  
57  
58  
59  
60

1  
2  
3 hypothesized a priori to be predictors of suicidality (e.g., psychedelic drug use) and those that  
4  
5 were significantly correlated with the outcome at the  $p < 0.05$  level in bivariate analyses were  
6  
7 subsequently fitted into a multivariable Cox model. Backward model selection was used to  
8  
9 determine the final multivariable model with the best overall fit, as indicated by the lowest  
10  
11 Akaike information criterion (AIC) value. A complete case analysis was used, where  
12  
13 observations with missing data were excluded from analyses, and participants who were lost to  
14  
15 follow-up were right censored at their most recent study visit. All statistical analyses were  
16  
17 performed using SAS software version 9.4 (SAS Institute, Cary, NC, USA). Two-sided p-values  
18  
19 are reported.  
20  
21  
22  
23  
24  
25  
26

## 27 **RESULTS**

### 28 **Socio-Demographic Characteristics**

29  
30  
31 Of the total 766 women who completed the baseline questionnaire, 46% (n=355) reported ever  
32  
33 experiencing suicidality (45%; n=343 reported suicidal thoughts, 32%; n=245 attempted suicide)  
34  
35 and were thus excluded from this analysis. A total of 290 women without suicidality who  
36  
37 completed at least one follow-up visit were eligible for inclusion in the present analysis.  
38  
39 Participants were followed for a total of 53.5 months (median = 29.9 months). Baseline  
40  
41 characteristics of participants who reported suicidality during follow-up compared to those who  
42  
43 did not are displayed in Table 1.  
44  
45  
46  
47  
48  
49  
50

51 Overall, 11% (n=31) thought about or attempted suicide for the first time during follow-up, with  
52  
53 an incidence density of 4.42 per 100 person-years (95%CI 3.10 to 6.30). The median age was 36  
54  
55 (interquartile range [IQR] 29 to 42) and 16% (n=45) of participants identified as gender or sexual  
56  
57  
58  
59  
60

1  
2  
3 minorities. One third (n=93) identified as Indigenous and one quarter (n=73) had been homeless  
4 in the last six months. Half of participants (49%; n=142) solicited clients on the streets, and 37%  
5 (n=106) solicited clients in indoor establishments. In terms of workplace violence, 14% (n=41)  
6 and 37% (n=107) reported physical/sexual violence from clients and police harassment/arrest,  
7 respectively. Nearly half (47%; n=136) of participants reported ever being physically and/or  
8 sexually abused before age 18, and among those who reported suicidality, 77% (n=24/31)  
9 experienced childhood abuse compared to 43% (n=112/259) among those who did not report  
10 suicidality (p<0.001).  
11  
12  
13  
14  
15  
16  
17  
18  
19  
20  
21  
22  
23  
24

### 25 **Substance Use**

26 Over half of participants reported ever using crack (63%, n=184) or cocaine (56%; n=162), with  
27 higher proportions of crack and cocaine use among those reporting suicidality than those who did  
28 not (p=0.003). Close to half (49%, n=141) reported lifetime heroin use, which was significantly  
29 higher among those who reported suicidality than those who did not (68% vs. 46%, p=0.02).  
30  
31 Approximately one third (31%, n=90) of participants had ever used crystal methamphetamine,  
32 and this was significantly higher among those who reported suicidality than those who did not  
33 (58% vs. 28%, p<0.001). Overall, 27% (n=79) of participants reported ever using a psychedelic  
34 substance, and of those, 75% (n=59) had used MDMA/ecstasy, 35% (n=28) had used LSD/acid,  
35 and 30% (n=24) had used psilocybin/magic mushrooms.  
36  
37  
38  
39  
40  
41  
42  
43  
44  
45  
46  
47  
48  
49  
50

### 51 **Bivariate and Multivariable Cox Analyses**

52 Unadjusted and adjusted hazard ratios for factors associated with a first episode of suicidality  
53 during follow-up are displayed in Table 2. In the final multivariable model, crystal  
54  
55  
56  
57  
58  
59  
60

1  
2  
3 methamphetamine use (AHR 3.25; 95%CI 1.47 to 7.21) and physical and/or sexual childhood  
4  
5 abuse (AHR 3.54; 95%CI 1.49 to 8.40) remained independently associated with time to  
6  
7 suicidality. Psychedelic use was associated with a 60% reduced hazard of suicidality (AHR 0.40;  
8  
9 95%CI 0.17 to 0.94).  
10  
11

## 12 13 14 15 **DISCUSSION**

16  
17 This study demonstrated that among marginalized women, many of whom are street-involved  
18  
19 and experience a disproportionate burden of violence, trauma, psychological distress and suicide,  
20  
21 naturalistic psychedelic drug use predicted a significantly reduced hazard for suicidality. Crystal  
22  
23 methamphetamine use and childhood abuse predisposed women to suicidality corresponding to  
24  
25 more than a three-fold increased hazard. Suicidality was highly prevalent, with almost half of  
26  
27 women reporting lifetime suicidality at baseline, and 11% reporting a first episode of suicidality  
28  
29 in the last six months during follow-up. Few studies have longitudinally examined predictors of  
30  
31 suicidality among marginalized sex workers, and of the available data, most are cross-sectional  
32  
33 and/or conducted in lower and middle income settings [8,16,42,43]. The present study, based on  
34  
35 a community-based, prospective cohort of marginalized women, adds to a growing body of  
36  
37 literature documenting the protective and therapeutic potentials of psychedelic substances  
38  
39 [23,29,39,44,45].  
40  
41  
42  
43  
44  
45  
46  
47

48 Data were self-reported, and questions pertaining to events that occurred in the past may be  
49  
50 subject to recall bias. Variables examined included sensitive and highly stigmatized topics such  
51  
52 as childhood trauma, violence, and illicit drug use, which introduce the potential for social  
53  
54 desirability and reporting bias. However, the likelihood of these biases is reduced by the  
55  
56  
57  
58  
59  
60

1  
2  
3 community-based nature of the study. While lifetime psychedelic drug use was found to reduce  
4  
5 the hazard of suicidality, the associations uncovered in this analysis cannot be determined as  
6  
7 causal. Suicidality is influenced by complex individual, interpersonal and structural variables,  
8  
9 and not all potential confounding variables could be controlled for in this study. For example,  
10  
11 women who use psychedelics may also possess some characteristic(s) associated with a reduced  
12  
13 likelihood of being suicidal (e.g., openness to experience, curiosity, or spirituality), which were  
14  
15 not examined in this study. Despite the relative safety of psychedelic drug use as evidenced from  
16  
17 the clinical and non-clinical literature [36,46–49], it should be noted that the use of psychedelics,  
18  
19 particularly with unknown doses sourced from unregulated street markets, is not without risk,  
20  
21 highlighting the importance of set and setting [23]; the doses and contexts of psychedelic use  
22  
23 among women in the present study could not be determined. The standard error for the  
24  
25 association between psychedelic use and suicidality was somewhat high, resulting in a wider  
26  
27 confidence interval. However, a large and significant protective effect was demonstrated in  
28  
29 multivariable analysis, despite the relatively small number of events for suicidality over follow-  
30  
31 up. With a larger sample size, we would expect a narrower confidence interval for this  
32  
33 association. The study population included women from a wide-ranging representation of sex  
34  
35 work environments, yet findings may not be fully generalizable to sex workers in other settings.  
36  
37 The mapping of working areas and time–location sampling helped to ensure a representative  
38  
39 sample and to minimize selection bias.  
40  
41  
42  
43  
44  
45  
46  
47  
48  
49

50  
51 This study is the first to longitudinally investigate associations with suicidality among women  
52  
53 sex workers in North America, and builds upon prior cross-sectional research highlighting  
54  
55 significantly elevated rates of suicidality and unmet mental health needs in this population. For  
56  
57  
58  
59  
60

1  
2  
3 example, a study conducted in Sydney, Australia demonstrated significant links between  
4 depression, trauma, and suicidality, where an estimated 42% of street-based female sex workers  
5 reported attempting suicide and 74% reported lifetime suicidal ideation [10,42]. While estimates  
6  
7  
8 reported attempting suicide and 74% reported lifetime suicidal ideation [10,42]. While estimates  
9  
10 of mental illness vary significantly across sex work settings, up to three-quarters of street- and  
11 drug-involved sex workers in a US study reported severe depression, anxiety, or PTSD [12].  
12  
13 Notably, our study demonstrated a lower risk of suicidality among women working indoors in  
14 bivariate analysis (HR 0.19, p=0.009), lending support to the critical role of safer workplace  
15 environments in mitigating risk. In studies conducted in Asia, recent suicide attempts ranged  
16 from 19% among sex workers in Goa, India [16] to 38% among sex workers in China [8,11,50],  
17 many of whom work in marginalized settings with few workplace protections. Transgender  
18 women involved in sex work, a sub-population experiencing significant psychosocial  
19 vulnerability and discrimination, report notably further elevated rates of suicidality: three  
20 quarters of participants in San Francisco reported suicide ideation, of whom 64% attempted  
21 suicide [51]. Our findings extend upon research establishing associations between lifetime use of  
22 illicit drugs and increased risk for suicidality: in bivariate analysis, all classes of illicit drugs  
23 were demonstrated to increase the hazard of suicidality with the exception of psychedelics. In  
24 multivariable analysis, psychedelics were independently associated with a 60% reduced hazard  
25 for suicidality, contributing to emergent evidence on the potential of psychedelics to mitigate  
26 risks for suicide.  
27  
28  
29  
30  
31  
32  
33  
34  
35  
36  
37  
38  
39  
40  
41  
42  
43  
44  
45  
46  
47  
48  
49  
50

51 Among the various scientific studies examining the potential benefits of psychedelic drug use, a  
52 recent and large (n>190,000) population study conducted among adult respondents in the US  
53 demonstrated that psychedelics are associated with reduced psychological distress and suicidality  
54  
55  
56  
57  
58  
59  
60

1  
2  
3 [33]. A recent open-label trial conducted in the UK demonstrated the safety and efficacy of  
4  
5 psilocybin for treating major depression [36], and another open-label trial in Brazil found rapid  
6  
7 and sustained anti-depressant effects from the Amazonian psychedelic brew ayahuasca  
8  
9 administered in a clinical setting [38]. The ways in which psychedelics may alleviate suffering  
10  
11 associated with some mental illness is undoubtedly a complex phenomenon. It has been  
12  
13 hypothesized that psychedelics modify neurobiological processes that may be involved in  
14  
15 suicidality by down-regulating 5-HT<sub>2A</sub> serotonin receptors, as increased binding (and up-  
16  
17 regulation) of this receptor has been implicated in major depression and suicide [39,45,52].  
18  
19 Further, there is evidence that psychedelics alter neural network connectivity and enhance recall  
20  
21 of autobiographical memories, which may facilitate positive reprocessing of trauma [26,53,54].  
22  
23 Recent randomized, placebo-controlled, cross-over studies found that psilocybin (among n=25  
24  
25 adults) and LSD (among n=20 adults) were associated with increased positive mood and  
26  
27 psychological wellbeing [37,39], supporting other work demonstrating the anti-  
28  
29 depressive/anxiolytic effects of psychedelics [27,40,55,46]. The potential of psychedelics to  
30  
31 elicit “mystical-type” experiences, with profound and sustained positive changes in attitudes and  
32  
33 mood, may play a key role in addiction treatment interventions [41,45,56,57]. For example,  
34  
35 psilocybin-assisted psychotherapy demonstrated high success in smoking cessation outcomes at  
36  
37 six months follow-up (abstinence rates of 80%), and mystical experiences generated from the  
38  
39 psilocybin sessions were significantly correlated with elevated ratings of personal  
40  
41 meaningfulness, wellbeing, and life satisfaction [58]. Randomized control trials in the US and  
42  
43 Switzerland have demonstrated significant long-term improvements among patients with  
44  
45 treatment-resistant PTSD following MDMA-assisted psychotherapy [59,28], and further research  
46  
47 is continuing in an international multi-site phase 3 clinical trial.  
48  
49  
50  
51  
52  
53  
54  
55  
56  
57  
58  
59  
60



1  
2  
3  
4  
5  
6 Marginalized and street-based sex workers experience complex and synergistic effects between  
7  
8 trauma, lack of workplace safety, and mental health/substance use comorbidities that elevate risk  
9  
10 of suicidality. Marginalized women and sex workers who use drugs report high rates of  
11  
12 childhood abuse [60–62], which is associated with an increased likelihood of experiencing  
13  
14 subsequent physical or sexual violence, as well as initiating injection drug use [63–65]. For those  
15  
16 suffering from emotional trauma stemming from violence, including indirect violence (i.e.,  
17  
18 witnessing violence), there may be a proclivity to use drugs for self-medication [66,67]. Violence  
19  
20 and sexual coercion have been found to be significantly associated with suicidality among sex  
21  
22 worker populations in China and India [8,9,16,68]. As demonstrated in this study, having an  
23  
24 early traumatic life event is a key risk factor for suicide among sex workers, a high proportion of  
25  
26 whom are Indigenous, and experiencing historical trauma can have harmful intergenerational  
27  
28 impacts [1,17]. Given that historical experiences of violence and trauma denote significant risk  
29  
30 for suicide, there is an urgent need to provide integrated, trauma-informed intervention services  
31  
32 for sex workers and other marginalized populations. Currently available interventions and  
33  
34 pharmacological treatments for suicidality show limited efficacy, and concerted efforts should be  
35  
36 made not only to increase access to evidence-based treatments, but also to explore alternative  
37  
38 approaches to improving mental health and wellbeing. Emerging research and evidence show  
39  
40 positive outcomes with psychedelic-assisted treatments, which have demonstrated an excellent  
41  
42 record of safety with few to no serious adverse effects reported [23,27,36,69]. This study  
43  
44 suggests psychedelic substances may hold promise as useful tools in addressing mental health  
45  
46 issues and remediating risks for psychological distress and suicide.  
47  
48  
49  
50  
51  
52  
53  
54  
55  
56  
57  
58  
59  
60

## CONCLUSION

The high rate of suicidality among marginalized women identified in this study is a critical public health concern. In the context of emerging research and evidence on the therapeutic potential of psychedelics to treat mental health issues, our findings demonstrated that naturalistic psychedelic use was independently associated with reduced suicidality among sex workers, while other drug use and childhood trauma increased the hazard for suicidality. This is the first study to longitudinally investigate the relationship between psychedelic drug use and suicidality. While observational, this study supports calls for further investigation of the therapeutic utility of psychedelic drugs in treating mental illness and promoting mental wellness.

1  
2  
3  
4  
5  
6  
7  
8  
9  
10  
11  
12  
13  
**Acknowledgments:** We thank all those who contributed their time and expertise to this project, particularly participants, AESHA community advisory board members and partner agencies. We wish to acknowledge Chrissy Taylor, Jill Chettiar, Jennifer Morris, Tina Ok, Avery Alder, Emily Groundwater, Jane Li, Sylvia Machat, Lauren Martin McCraw, Minshu Mo, Chris Rzepa, Brittany Udall, Rachel Nicoletti, Emily Sarah Leake, Ray Croy, Natalie Blair, Anita Dhanoa, Emily Sollows, Nelly Gomez, Zoe Hassall, Bridget Simpson, Krista Butler, and Peter Vann for their research and administrative support.

14  
15  
16  
17  
18  
19  
20  
**Contributors:** EA and KS conceptualized and designed the study. EA, SAS, MB, and KS contributed to the interpretation and analysis of data. EA wrote the first draft of the manuscript. SAS, KT, MB, EW and KS contributed to reviewing and editing the manuscript. EA, SAS, KT, MB, EW and KS critically revised the manuscript and approved the final draft. KS is the guarantor.

21  
22  
23  
24  
25  
26  
27  
28  
29  
30  
**Funding:** This study was supported by the US National Institutes of Health (R01DA028648), the Canadian Institutes of Health Research (HHP-98835), and MacAIDS. KS is partially supported by a Canada Research Chair in Global Sexual Health and HIV/AIDS and the Michael Smith Foundation for Health Research. EA is supported by a Canadian Institutes of Health Research Doctoral Award. SAS is partially supported by a NIDA merit award (R37DA019829). EW is supported in part by a Tier 1 Canada Research Chair in Inner-City Medicine award. The study funders had no role in the study design, data collection, analysis, interpretation, writing of the report, or decision to submit the paper for publication.

31  
32  
33  
34  
35  
36  
37  
**Competing interests:** All authors have completed the ICMJE uniform disclosure form at [www.icmje.org/coi\\_disclosure.pdf](http://www.icmje.org/coi_disclosure.pdf) (available on request from the corresponding author) and declare: no support from any organisation for the submitted work; no financial relationships with any organisations that might have an interest in the submitted work in the previous three years; no other relationships or activities that could appear to have influenced the submitted work.

38  
39  
40  
41  
**Ethical approval:** This study holds ethical approval through Providence Health Care/University of British Columbia Research Ethics Board.

42  
43  
44  
45  
46  
**Transparency:** The study guarantor (KS) affirms that the manuscript is an honest, accurate, and transparent account of the study being reported; that no important aspects of the study have been omitted; and that any discrepancies with the study as planned have been explained.

47  
48  
49  
50  
51  
52  
53  
54  
55  
56  
57  
58  
59  
60  
**Data sharing:** no additional data available.

## REFERENCES

- 1 Hawton K, van Heeringen K. Suicide. *Lancet* 2009;**373**:1372–81.
- 2 World Health Organization. Preventing Suicide: A Global Imperative. Geneva, Switzerland: 2014. [http://www.who.int/mental\\_health/suicide-prevention/world\\_report\\_2014/en/](http://www.who.int/mental_health/suicide-prevention/world_report_2014/en/) (accessed Dec 2016).
- 3 Whiteford HA, Degenhardt L, Rehm J, *et al*. Global burden of disease attributable to mental and substance use disorders: Findings from the Global Burden of Disease Study 2010. *Lancet* 2013;**382**:1575–86.
- 4 Statistics Canada. Suicide Rates: An Overview. Ottawa: 2015. <http://www.statcan.gc.ca/pub/82-624-x/2012001/article/11696-eng.htm> (accessed Dec 2016).
- 5 Shannon K, Strathdee SA, Goldenberg SM, *et al*. Global epidemiology of HIV among female sex workers: Influence of structural determinants. *Lancet* 2015;**385**:55–71.
- 6 Argento E, Muldoon K, Duff P, *et al*. High prevalence and partner correlates of physical and sexual violence by intimate partners among street and off-street sex workers. *PLoS One* 2014;**9**:e102129.
- 7 Deering K, Amin A, Shoveller J, *et al*. A systematic review of the global magnitude and drivers of violence against sex workers. *Am J Public Health* 2014;**104**:e42–54.
- 8 Gu J, Lau JTF, Li M, *et al*. Socio-ecological factors associated with depression, suicidal ideation and suicidal attempt among female injection drug users who are sex workers in China. *Drug Alcohol Depend* 2014;**144**:102–10.
- 9 Zhang L, Li X, Wang B, *et al*. Violence, stigma and mental health among female sex workers in China: a structural equation modeling. *Women Health* 2016;**242**.
- 10 Roxburgh A, Degenhardt L, Copeland J. Posttraumatic stress disorder among female street-based sex workers in the greater Sydney area, Australia. *BMC Psychiatry* 2006;**6**:1–12.
- 11 Lau JTF, Tsui HY, Ho SPY, *et al*. Prevalence of psychological problems and relationships with condom use and HIV prevention behaviors among Chinese female sex workers in Hong Kong. *AIDS Care* 2010;**22**:659–68.
- 12 Surratt HL, Kurtz SP, Chen M, *et al*. HIV risk among female sex workers in Miami: the impact of violent victimization and untreated mental illness. *AIDS Care* 2012;**24**:553–61.
- 13 Hadland SE, Marshall BDL, Kerr T, *et al*. Suicide and history of childhood trauma among street youth. *J Affect Disord* 2012;**136**:377–80.
- 14 O'Connor RC, Nock MK. The psychology of suicidal behaviour. *The Lancet Psychiatry* 2014;**1**:73–85.
- 15 Gilchrist G, Gruer L, Atkinson J. Comparison of drug use and psychiatric morbidity between prostitute and non-prostitute female drug users in Glasgow, Scotland. *Addict Behav* 2005;**30**:1019–23.
- 16 Shahmanesh M, Wayal S, Cowan F, *et al*. Suicidal behavior among female sex workers in Goa, India: The silent epidemic. *Am J Public Health* 2009;**99**:1239–46.
- 17 Bingham B, Leo D, Zhang R, *et al*. Generational sex work and HIV risk among Indigenous women in a street-based urban Canadian setting. *Cult. Health Sex.* 2014;**16**:440–52.
- 18 Benoit C, Carroll D, Chaudhry M. In search of a Healing Place: Aboriginal women in Vancouver's Downtown Eastside. *Soc Sci Med* 2003;**56**:821–33.

- 1  
2  
3  
4 19 Li Z, Page A, Martin G, *et al.* Attributable risk of psychiatric and socio-economic factors  
5 for suicide from individual-level, population-based studies: A systematic review. *Soc Sci*  
6 *Med* 2011;**72**:608–16.
- 7 20 Zalsman G, Hawton K, Wasserman D, *et al.* Suicide prevention strategies revisited: 10-  
8 year systematic review. *The Lancet Psychiatry* 2016;**3**:646–59.
- 9 21 Klonsky ED, May AM, Saffer BY. Suicide, Suicide Attempts, and Suicidal Ideation. *Annu*  
10 *Rev Clin Psychol* 2016;**12**:307–30.
- 11 22 National Action Alliance for Suicide Prevention: Research Prioritization Task Force. A  
12 Prioritized Research Agenda for Suicide Prevention: An Action Plan to Save Lives.  
13 Rockville, MD: 2014. [www.suicide-research-agenda.org](http://www.suicide-research-agenda.org) (accessed Dec 2016).
- 14 23 Tupper K, Wood E, Yensen R, *et al.* Psychedelic medicine: a re-emerging therapeutic  
15 paradigm. *Can Med Assoc J* 2015;**187**:1054–9.
- 16 24 Nichols DE. Hallucinogens. *Pharmacol Ther* 2004;**101**:131–81.
- 17 25 Bedi G, Hyman D, De Wit H. Is ecstasy an ‘empathogen’? Effects of 3,4-  
18 methylenedioxymethamphetamine on prosocial feelings and identification of emotional  
19 states in others. *Biol Psychiatry* 2010;**68**:1134–40.
- 20 26 Carhart-Harris RL, Leech R, Williams TM, *et al.* Implications for psychedelic-assisted  
21 psychotherapy: Functional magnetic resonance imaging study with psilocybin. *Br J*  
22 *Psychiatry* 2012;**200**:238–44.
- 23 27 dos Santos RG, Osorio FL, Crippa JAS, *et al.* Antidepressive, anxiolytic, and antiaddictive  
24 effects of ayahuasca, psilocybin and lysergic acid diethylamide (LSD): a systematic  
25 review of clinical trials published in the last 25 years: antidepressive effects of ayahuasca,  
26 psilocybin and LSD. *Ther Adv Psychopharmacol* 2016;**6**:193-213.
- 27 28 Oehen P, Schnyder U. A randomized, controlled pilot study of MDMA ( $\pm$  3,4  
28 methylenedioxymethamphetamine)-assisted psychotherapy for treatment of resistant,  
29 chronic Post-Traumatic Stress Disorder (PTSD). *J Psychopharmacol* 2013;**27**:40–52.
- 30 29 Sessa B. Shaping the renaissance of psychedelic research. *Lancet* 2012;**380**:200–1.
- 31 30 Sessa B, Johnson MW. Can psychedelic compounds play a part in drug dependence  
32 therapy? *Br J Psychiatry* 2015;**206**:1–3.
- 33 31 Hendricks PS, Clark CB, Johnson MW, *et al.* Hallucinogen use predicts reduced  
34 recidivism among substance-involved offenders under community corrections supervision.  
35 *J Psychopharmacol* 2014;**28**:62–6.
- 36 32 Walsh Z, Hendricks PS, Smith S, *et al.* Hallucinogen use and intimate partner violence:  
37 Prospective evidence consistent with protective effects among men with histories of  
38 problematic substance use. *J Psychopharmacol* 2016;**30**:601-607.
- 39 33 Hendricks PS, Thorne CB, Clark CB, *et al.* Classic psychedelic use is associated with  
40 reduced psychological distress and suicidality in the United States adult population. *J*  
41 *Psychopharmacol* 2015;**29**:280–8.
- 42 34 Krebs TS, Johansen P-Ø. Psychedelics and mental health: a population study. *PLoS One*  
43 2013;**8**:e63972. doi:10.1371/journal.pone.0063972
- 44 35 Johansen P-Ø, Krebs TS. Psychedelics not linked to mental health problems or suicidal  
45 behavior: A population study. *J Psychopharmacol* 2015;**29**:270–9.
- 46 36 Carhart-Harris RL, Bolstridge M, Rucker J, *et al.* Psilocybin with psychological support  
47 for treatment-resistant depression: An open-label feasibility study. *The Lancet Psychiatry*  
48 2016;**3**:619–27.
- 49 37 Carhart-Harris R, Kaelen M, Bolstridge M, *et al.* The paradoxical psychological effects of  
50  
51  
52  
53  
54  
55  
56  
57  
58  
59  
60

- 1  
2  
3 lysergic acid diethylamide (LSD). *Psychol Med* 2016;1–12.  
4 doi:10.1017/S0033291715002901  
5  
6 38 Sanches R, de Lima Osorio F, dos Santos R, *et al*. Antidepressant effects of a single dose  
7 of ayahuasca in patients with recurrent depression: A SPECT study. *J Clin*  
8 *Psychopharmacol* 2016;**36**:77–81.  
9  
10 39 Kraehenmann R, Preller KH, Scheidegger M, *et al*. Psilocybin-induced decrease in  
11 amygdala reactivity correlates with enhanced positive mood in healthy volunteers. *Biol*  
12 *Psychiatry* 2015;**78**:572–81.  
13  
14 40 Grob CS, Danforth AL, Chopra GS, *et al*. Pilot study of psilocybin treatment for anxiety  
15 in patients with advanced-stage cancer. *Arch Gen Psychiatry* 2011;**68**:71–8.  
16  
17 41 Griffiths RR, Johnson MW, Richards WA, *et al*. Psilocybin occasioned mystical-type  
18 experiences: Immediate and persisting dose-related effects. *Psychopharmacology (Berl)*  
19 2011;**218**:649–65.  
20  
21 42 Roxburgh A, Degenhardt L, Copeland J, *et al*. Drug dependence and associated risks  
22 among female street-based sex workers in the Greater Sydney Area, Australia. *Subst Use*  
23 *Misuse* 2008;**43**:1202–17.  
24  
25 43 Hong Y, Zhang C, Li X, *et al*. Partner violence and psychosocial distress among female  
26 sex workers in China. *PLoS One* 2013;**8**:e62290. doi:10.1371/journal.pone.0062290  
27  
28 44 Dyck E. LSD: A new treatment emerging from the past. *Can Med Assoc J*  
29 2015;**187**:1079–80.  
30  
31 45 Bogenschutz MP, Johnson MW. Classic hallucinogens in the treatment of addictions.  
32 *Prog Neuro-Psychopharmacology Biol Psychiatry* 2015;**64**:250–8.  
33  
34 46 Gasser P, Holstein D, Michel Y, *et al*. Safety and efficacy of lysergic acid diethylamide-  
35 assisted psychotherapy for anxiety associated with life-threatening diseases. *J Nerv Ment*  
36 *Dis* 2014;**202**:513–20.  
37  
38 47 Mithoefer, Wagner M, Mithoefer A, *et al*. The safety and efficacy of  $\pm$ 3,4-  
39 methylenedioxymethamphetamine-assisted psychotherapy in subjects with chronic,  
40 treatment-resistant posttraumatic stress disorder: the first randomized controlled pilot  
41 study. *J Psychopharmacol* 2011;**25**:439–52.  
42  
43 48 Winstock A, Barratt M, Ferris J, *et al*. Global Drug Survey. London: 2017.  
44 [https://www.globaldrugsurvey.com/wp-](https://www.globaldrugsurvey.com/wp-content/themes/globaldrugsurvey/results/GDS2017_key-findings-report_final.pdf)  
45 [content/themes/globaldrugsurvey/results/GDS2017\\_key-findings-report\\_final.pdf](https://www.globaldrugsurvey.com/wp-content/themes/globaldrugsurvey/results/GDS2017_key-findings-report_final.pdf)  
46 (accessed June 2017).  
47  
48 49 Nutt DJ, King LA, Phillips LD. Drug harms in the UK: A multicriteria decision analysis.  
49 *Lancet* 2010;**376**:1558–65.  
50  
51 50 Jung M. Associations of physical and sexual health with suicide attempts among female  
52 sex workers in South Korea. *Sex Disabil* 2013;**31**:275–86.  
53  
54 51 Nemoto T, Boedeker B, Iwamoto M. Social support, exposure to violence and  
55 transphobia, and correlates of depression among male-to-female transgender women with  
56 a history of sex work. *Am J Public Health* 2011;**101**:1980–8.  
57  
58 52 Anisman H, Du L, Palkovits M, *et al*. Serotonin receptor subtype and p11 mRNA  
59 expression in stress-relevant brain regions of suicide and control subjects. *J Psychiatry*  
60 *Neurosci* 2008;**33**:131–41.  
53  
54 53 Carhart-Harris RL, Leech R, Hellyer PJ, *et al*. The entropic brain: a theory of conscious  
55 states informed by neuroimaging research with psychedelic drugs. *Front Hum Neurosci*  
56 2014;**8**. doi:10.3389/fnhum.2014.00020  
57  
58  
59  
60

- 1  
2  
3 54 Carhart-Harris RL, Erritzoe D, Williams T, *et al.* Neural correlates of the psychedelic state  
4 as determined by fMRI studies with psilocybin. *Proc Natl Acad Sci U S A*  
5 2012;**109**:2138–43.  
6  
7 55 Osório FL, Sanches RF, Macedo LR, *et al.* Antidepressant effects of a single dose of  
8 ayahuasca in patients with recurrent depression: a preliminary report. *Rev Bras Psiquiatr*  
9 2016;**37**:13–20.  
10  
11 56 Griffiths RR, Richards WA, McCann U, *et al.* Psilocybin can occasion mystical-type  
12 experiences having substantial and sustained personal meaning and spiritual significance.  
13 *Psychopharmacology (Berl)* 2006;**187**:268–83.  
14  
15 57 Bouso JC, Palhano-Fontes F, Rodriguez-Fornells A, *et al.* Long-term use of psychedelic  
16 drugs is associated with differences in brain structure and personality in humans. *Eur*  
17 *Neuropsychopharmacol* 2015;**25**:483–92.  
18  
19 58 Johnson MW, Garcia-Romeu A, Cosimano MP, *et al.* Pilot study of the 5-HT<sub>2A</sub>R agonist  
20 psilocybin in the treatment of tobacco addiction. *J Psychopharmacol* 2014;**28**:983–92.  
21  
22 59 Mithoefer MC, Wagner MT, Mithoefer AT, *et al.* Durability of improvement in post-  
23 traumatic stress disorder symptoms and absence of harmful effects or drug dependency  
24 after 3,4-methylenedioxymethamphetamine-assisted psychotherapy: a prospective long-  
25 term follow-up study. *J Psychopharmacol* 2013;**27**:28–39.  
26  
27 60 Rio Navarro J, Cohen J, Rocillo Arechaga E, *et al.* Physical and sexual violence, mental  
28 health indicators, and treatment seeking among street-based population groups in  
29 Tegucigalpa, Honduras. *Pan Am J Public Heal* 2012;**31**:388–95.  
30  
31 61 Stolz J-A, Shannon K, Kerr T, *et al.* Associations between childhood maltreatment and  
32 sex work in a cohort of drug-using youth. *Soc Sci Med* 2007;**65**:1214–21.  
33  
34 62 Argento E, Chettiar J, Nguyen P, *et al.* Prevalence and correlates of nonmedical  
35 prescription opioid use among a cohort of sex workers in Vancouver, Canada. *Int J Drug*  
36 *Policy* 2015;**26**:59–66.  
37  
38 63 Kerr T, Stoltz J, Marshall BDL, *et al.* Childhood Trauma and Injection Drug Use among  
39 High-Risk Youth. *J Adolesc Heal* 2009;**45**:300–2.  
40  
41 64 Ulibarri MD, Strathdee S a, Lozada R, *et al.* Intimate partner violence among female sex  
42 workers in two Mexico-U.S. border cities: partner characteristics and HIV risk-behaviors  
43 as correlates of abuse. *Psychol Trauma Theory, Res Pract Policy* 2010;**2**:318–25.  
44  
45 65 Argento E, Strathdee SA, Goldenberg S, *et al.* Violence, trauma and living with HIV:  
46 Longitudinal predictors of initiating crystal methamphetamine injection among sex  
47 workers. *Drug Alcohol Depend* 2017;**175**:198–204.  
48  
49 66 Tull MT, Gratz KL, Aklin WM, *et al.* A preliminary examination of the relationships  
50 between posttraumatic stress symptoms and crack/cocaine, heroin, and alcohol  
51 dependence. *J Anxiety Disord* 2010;**24**:55–62.  
52  
53 67 Romero-Daza N, Weeks M, Singer M. Conceptualizing the impact of indirect violence on  
54 HIV risk among women involved in street-level prostitution. *Aggress Violent Behav*  
55 2005;**10**:153–70.  
56  
57 68 Wang B, Li X, Stanton B, *et al.* Sexual coercion, HIV-related risk, and mental health  
58 among female sex workers in China. *Health Care Women Int* 2007;**28**:745–62.  
59  
60 69 Morgan CJA, Muetzfeldt L, Muetzfeldt M, *et al.* Harms associated with psychoactive  
substances: findings of the UK National Drug Survey. *J Psychopharmacol* 2010;**24**:147–  
53.

**Table 1: Baseline characteristics of sex workers in Vancouver who thought about or attempted suicide over follow-up, compared to those who did not (N=290)**

| Characteristics                                         | Suicidality<br>n=31 (11%) | No Suicidality<br>n=259 (89%) | p-value |
|---------------------------------------------------------|---------------------------|-------------------------------|---------|
| Age (median, IQR)                                       | 34 (27 to 47)             | 36 (29 to 42)                 | 0.767   |
| Gender/sexual minority                                  | 7 (22.6)                  | 38 (14.7)                     | 0.291   |
| Born in Canada                                          | 29 (93.6)                 | 156 (60.2)                    | <0.001  |
| Indigenous ancestry                                     | 18 (58.1)                 | 75 (29.0)                     | 0.001   |
| Education, high school or greater                       | 10 (32.3)                 | 142 (54.8)                    | 0.017   |
| HIV seropositivity <sup>†</sup>                         | 7 (22.6)                  | 26 (10.0)                     | 0.065   |
| STI seropositivity <sup>†</sup>                         | 3 (9.7)                   | 35 (13.5)                     | 0.778   |
| Homelessness <sup>†</sup>                               | 10 (32.3)                 | 63 (24.3)                     | 0.336   |
| Psychedelic use                                         | 8 (25.8)                  | 71 (27.4)                     | 0.849   |
| Cannabis use                                            | 27 (87.1)                 | 152 (58.7)                    | 0.002   |
| Prescription opioid use                                 | 12 (38.7)                 | 77 (29.7)                     | 0.306   |
| Crack use                                               | 27 (87.1)                 | 157 (60.6)                    | 0.004   |
| Cocaine use                                             | 25 (80.7)                 | 137 (52.9)                    | 0.003   |
| Crystal meth use                                        | 18 (58.1)                 | 72 (27.8)                     | <0.001  |
| Heroin use                                              | 21 (67.7)                 | 120 (46.3)                    | 0.024   |
| Non-injection drug use <sup>†</sup>                     | 27 (87.1)                 | 148 (57.1)                    | 0.001   |
| Injection drug use <sup>†</sup>                         | 16 (51.6)                 | 81 (31.3)                     | 0.023   |
| Physical/sexual client violence <sup>†</sup>            | 5 (16.1)                  | 36 (13.9)                     | 0.784   |
| Physical/sexual childhood abuse                         | 24 (77.4)                 | 112 (43.2)                    | <0.001  |
| Police harassment/arrest <sup>†</sup>                   | 16 (51.6)                 | 91 (35.1)                     | 0.072   |
| <i>Primary place to solicit clients<sup>†</sup></i>     |                           |                               |         |
| Street/public space                                     | 24 (77.4)                 | 118 (45.6)                    |         |
| Indoor/in-call venue                                    | 3 (9.7)                   | 103 (39.8)                    |         |
| Independent/self-advertising (e.g., newspapers, online) | 4 (12.9)                  | 38 (14.7)                     | 0.002   |

<sup>†</sup> In the last 6 months



**Table 2: Unadjusted and adjusted hazard ratios for predictors of time to suicidality among sex workers in Vancouver, 2010-2014 (N=290)**

| Characteristics                                     | Unadjusted Hazard Ratio (95% CI) | p-value | Adjusted Hazard Ratio (95% CI) | p-value |
|-----------------------------------------------------|----------------------------------|---------|--------------------------------|---------|
| Psychedelic use                                     | 1.00 (0.45 to 2.23)              | 0.995   | 0.40 (0.17 to 0.94)*           | 0.036   |
| Cannabis use                                        | 3.44 (1.21 to 9.79)              | 0.021   |                                |         |
| Prescription opioid use                             | 1.88 (0.91 to 3.90)              | 0.089   |                                |         |
| Crack use                                           | 3.06 (1.07 to 8.74)              | 0.037   |                                |         |
| Cocaine use                                         | 2.53 (1.03 to 6.22)              | 0.043   |                                |         |
| Crystal meth use                                    | 3.73 (1.75 to 7.97)              | <0.001  | 3.25 (1.47 to 7.21)*           | 0.004   |
| Heroin use                                          | 2.26 (0.99 to 5.13)              | 0.053   |                                |         |
| HIV seropositivity <sup>†</sup>                     | 2.15 (0.92 to 5.06)              | 0.078   |                                |         |
| Childhood abuse                                     | 3.92 (1.69 to 9.09)              | 0.002   | 3.54 (1.49 to 8.40)*           | 0.004   |
| Indigenous ancestry                                 | 2.76 (1.34 to 5.67)              | 0.006   |                                |         |
| Canadian born                                       | 6.72 (1.62 to 27.95)             | 0.009   |                                |         |
| Homelessness <sup>†</sup>                           | 2.55 (1.19 to 5.44)              | 0.016   | 1.95 (0.91 to 4.17)*           | 0.085   |
| <i>Primary place to solicit clients<sup>†</sup></i> |                                  |         |                                |         |
| Indoor venue (vs. street)                           | 0.19 (0.06 to 0.66)              | 0.009   |                                |         |
| Independent (vs. street)                            | 0.38 (0.14 to 1.05)              | 0.061   |                                |         |

<sup>†</sup> In the last 6 months

\*Final multivariable model determined using backward selection with best overall fit, as indicated by the lowest Akaike information criterion (AIC) value.

STROBE 2007 (v4) Statement—Checklist of items that should be included in reports of *cohort studies*

| Section/Topic                | Item # | Recommendation                                                                                                                                                                       | Reported on page # |
|------------------------------|--------|--------------------------------------------------------------------------------------------------------------------------------------------------------------------------------------|--------------------|
| Title and abstract           | 1      | (a) Indicate the study's design with a commonly used term in the title or the abstract                                                                                               | Title page, 1      |
|                              |        | (b) Provide in the abstract an informative and balanced summary of what was done and what was found                                                                                  | 1                  |
| <b>Introduction</b>          |        |                                                                                                                                                                                      |                    |
| Background/rationale         | 2      | Explain the scientific background and rationale for the investigation being reported                                                                                                 | 3, 4               |
| Objectives                   | 3      | State specific objectives, including any prespecified hypotheses                                                                                                                     | 4, 5               |
| <b>Methods</b>               |        |                                                                                                                                                                                      |                    |
| Study design                 | 4      | Present key elements of study design early in the paper                                                                                                                              | 5, 6               |
| Setting                      | 5      | Describe the setting, locations, and relevant dates, including periods of recruitment, exposure, follow-up, and data collection                                                      | 5, 6               |
| Participants                 | 6      | (a) Give the eligibility criteria, and the sources and methods of selection of participants. Describe methods of follow-up                                                           | 5                  |
|                              |        | (b) For matched studies, give matching criteria and number of exposed and unexposed                                                                                                  | n/a                |
| Variables                    | 7      | Clearly define all outcomes, exposures, predictors, potential confounders, and effect modifiers. Give diagnostic criteria, if applicable                                             | 6, 7               |
| Data sources/<br>measurement | 8*     | For each variable of interest, give sources of data and details of methods of assessment (measurement). Describe comparability of assessment methods if there is more than one group | 5-7                |
| Bias                         | 9      | Describe any efforts to address potential sources of bias                                                                                                                            | 5, 10              |
| Study size                   | 10     | Explain how the study size was arrived at                                                                                                                                            | 6, 7               |
| Quantitative variables       | 11     | Explain how quantitative variables were handled in the analyses. If applicable, describe which groupings were chosen and why                                                         | 6, 7               |
| Statistical methods          | 12     | (a) Describe all statistical methods, including those used to control for confounding                                                                                                | 6, 7               |
|                              |        | (b) Describe any methods used to examine subgroups and interactions                                                                                                                  | 7                  |
|                              |        | (c) Explain how missing data were addressed                                                                                                                                          | 7                  |
|                              |        | (d) If applicable, explain how loss to follow-up was addressed                                                                                                                       | 7                  |
|                              |        | (e) Describe any sensitivity analyses                                                                                                                                                | n/a                |
| <b>Results</b>               |        |                                                                                                                                                                                      |                    |

|                          |     |                                                                                                                                                                                                              |             |
|--------------------------|-----|--------------------------------------------------------------------------------------------------------------------------------------------------------------------------------------------------------------|-------------|
| Participants             | 13* | (a) Report numbers of individuals at each stage of study—eg numbers potentially eligible, examined for eligibility, confirmed eligible, included in the study, completing follow-up, and analysed            | 7, 8        |
|                          |     | (b) Give reasons for non-participation at each stage                                                                                                                                                         | 6, 7        |
|                          |     | (c) Consider use of a flow diagram                                                                                                                                                                           |             |
| Descriptive data         | 14* | (a) Give characteristics of study participants (eg demographic, clinical, social) and information on exposures and potential confounders                                                                     | 7-9, 19, 20 |
|                          |     | (b) Indicate number of participants with missing data for each variable of interest                                                                                                                          | 7, 8        |
|                          |     | (c) Summarise follow-up time (eg, average and total amount)                                                                                                                                                  | 8           |
| Outcome data             | 15* | Report numbers of outcome events or summary measures over time                                                                                                                                               | 8           |
| Main results             | 16  | (a) Give unadjusted estimates and, if applicable, confounder-adjusted estimates and their precision (eg, 95% confidence interval). Make clear which confounders were adjusted for and why they were included | 9, 20, 7    |
|                          |     | (b) Report category boundaries when continuous variables were categorized                                                                                                                                    | n/a         |
|                          |     | (c) If relevant, consider translating estimates of relative risk into absolute risk for a meaningful time period                                                                                             | n/a         |
| Other analyses           | 17  | Report other analyses done—eg analyses of subgroups and interactions, and sensitivity analyses                                                                                                               | n/a         |
| <b>Discussion</b>        |     |                                                                                                                                                                                                              |             |
| Key results              | 18  | Summarise key results with reference to study objectives                                                                                                                                                     | 9           |
| <b>Limitations</b>       |     |                                                                                                                                                                                                              |             |
| Interpretation           | 20  | Give a cautious overall interpretation of results considering objectives, limitations, multiplicity of analyses, results from similar studies, and other relevant evidence                                   | 9, 10       |
| Generalisability         | 21  | Discuss the generalisability (external validity) of the study results                                                                                                                                        | 10          |
| <b>Other information</b> |     |                                                                                                                                                                                                              |             |
| Funding                  | 22  | Give the source of funding and the role of the funders for the present study and, if applicable, for the original study on which the present article is based                                                | 14          |

\*Give information separately for cases and controls in case-control studies and, if applicable, for exposed and unexposed groups in cohort and cross-sectional studies.

**Note:** An Explanation and Elaboration article discusses each checklist item and gives methodological background and published examples of transparent reporting. The STROBE checklist is best used in conjunction with this article (freely available on the Web sites of PLoS Medicine at <http://www.plosmedicine.org/>, Annals of Internal Medicine at <http://www.annals.org/>, and Epidemiology at <http://www.epidem.com/>). Information on the STROBE Initiative is available at [www.strobe-statement.org](http://www.strobe-statement.org).

# BMJ Open

## Does psychedelic drug use reduce risk of suicidality? Evidence from a longitudinal community-based cohort of marginalized women in a Canadian setting

|                                 |                                                                                                                                                                                                                                                                                                                                                                                                                                                                                                                                                                                                                                                                                                 |
|---------------------------------|-------------------------------------------------------------------------------------------------------------------------------------------------------------------------------------------------------------------------------------------------------------------------------------------------------------------------------------------------------------------------------------------------------------------------------------------------------------------------------------------------------------------------------------------------------------------------------------------------------------------------------------------------------------------------------------------------|
| Journal:                        | <i>BMJ Open</i>                                                                                                                                                                                                                                                                                                                                                                                                                                                                                                                                                                                                                                                                                 |
| Manuscript ID                   | bmjopen-2017-016025.R2                                                                                                                                                                                                                                                                                                                                                                                                                                                                                                                                                                                                                                                                          |
| Article Type:                   | Research                                                                                                                                                                                                                                                                                                                                                                                                                                                                                                                                                                                                                                                                                        |
| Date Submitted by the Author:   | 18-Jul-2017                                                                                                                                                                                                                                                                                                                                                                                                                                                                                                                                                                                                                                                                                     |
| Complete List of Authors:       | Argento, Elena; BC Centre for Excellence in HIV/AIDS, Gender and Sexual Health Initiative ; University of British Columbia, Interdisciplinary Studies<br>Strathdee, Steffanie; University of California San Diego, Medicine<br>Tupper, Kenneth; University of British Columbia, School of Population and Public Health; BC Centre on Substance Use<br>Braschel, Melissa; BC Centre for Excellence in HIV/AIDS, Gender and Sexual Health Initiative<br>Wood, Evan; BC Centre on Substance Use; University of British Columbia, Faculty of Medicine<br>Shannon, Kate; British Columbia Centre for Excellence in HIV/AIDS; University of British Columbia, Division of AIDS Department of Medicine |
| <b>Primary Subject Heading</b>: | Public health                                                                                                                                                                                                                                                                                                                                                                                                                                                                                                                                                                                                                                                                                   |
| Secondary Subject Heading:      | Evidence based practice, Epidemiology, Mental health                                                                                                                                                                                                                                                                                                                                                                                                                                                                                                                                                                                                                                            |
| Keywords:                       | sex workers, psychedelics, hallucinogens, MENTAL HEALTH, Suicide & self-harm < PSYCHIATRY                                                                                                                                                                                                                                                                                                                                                                                                                                                                                                                                                                                                       |
|                                 |                                                                                                                                                                                                                                                                                                                                                                                                                                                                                                                                                                                                                                                                                                 |

SCHOLARONE™  
Manuscripts

1  
2  
3  
4  
5  
6  
7  
8  
9  
10  
11  
12  
13  
14  
15  
16  
17  
18  
19  
20  
21  
22  
23  
24  
25  
26  
27  
28  
29  
30  
31  
32  
33  
34  
35  
36

## Does psychedelic drug use reduce risk of suicidality? Evidence from a longitudinal community-based cohort of marginalized women in a Canadian setting

Elena Argento, *PhD student*<sup>1,2</sup>, Steffanie A. Strathdee, *associate dean*<sup>3</sup>, Kenneth Tupper, *adjunct professor*<sup>4,5</sup>, Melissa Braschel, *statistician*<sup>1</sup>, Evan Wood, *professor*<sup>4,5</sup>, Kate Shannon, *associate professor*<sup>1,4</sup>

- 1) Gender and Sexual Health Initiative, St. Paul's Hospital, 608-1081 Burrard Street, Vancouver, BC, Canada V6Z 1Y6
- 2) Interdisciplinary Studies Graduate Program, University of British Columbia, 2357 Main Mall, Vancouver, BC, Canada V6T 1Z4
- 3) Department of Medicine, University of California San Diego, 9500 Gilman Drive, La Jolla, CA, USA 92093-0507
- 4) Faculty of Medicine, University of British Columbia, 2206 East Mall, Vancouver, BC, Canada V6T 1Z9
- 5) BC Centre on Substance Use, St. Paul's Hospital, 608-1081 Burrard Street, Vancouver, BC, Canada V6Z 1Y6

37  
38  
39  
40  
41  
42  
43  
44  
45  
46  
47  
48  
49  
50  
51  
52  
53  
54  
55  
56  
57  
58  
59  
60

**Send correspondence to:** **Kate Shannon**, PhD, MPH  
Associate Professor, Department of Medicine  
University of British Columbia  
Director, Gender and Sexual Health Initiative  
B.C. Centre for Excellence in HIV/AIDS  
St. Paul's Hospital, 608-1081 Burrard Street, Vancouver, B.C.,  
V6Z 1Y6, Canada  
**Tel:** (604) 804-9459  
**Fax:** (604) 806-9044  
**Email:** [gshi@cfenet.ubc.ca](mailto:gshi@cfenet.ubc.ca)

Word Count: 3544

## ABSTRACT

**Objective:** This study aimed to longitudinally investigate whether ever having used a psychedelic drug can have a protective effect on incidence of suicidality among marginalized women.

**Design:** Longitudinal community-based cohort study.

**Setting:** Data were drawn from a prospective, community-based cohort of marginalized women in Metro Vancouver, Canada.

**Participants:** 766 women completed the baseline questionnaire between January 2010 and August 2014. Participants who did not report suicidality at baseline and who completed at least one follow-up visit were included.

**Main outcome measure:** Extended Cox regression was used to model predictors of new suicidality (suicide ideation or attempts) over 54 months follow-up.

**Results:** Nearly half (46%; n=355) of participants reported prior suicidality and were thus excluded from the present analyses. Of 290 women eligible at baseline, 11% (n=31) reported recent suicidality during follow-up, with an incidence density of 4.42 per 100 person-years (95% Confidence Interval [CI] 3.10 to 6.30). In multivariable analysis, reported lifetime psychedelic drug use was associated with a 60% reduced hazard for suicidality (Adjusted Hazard Ratio [AHR] 0.40; 95%CI 0.17 to 0.94). Crystal methamphetamine use (AHR 3.25; 95%CI 1.47 to 7.21) and childhood abuse (AHR 3.54; 95%CI 1.49 to 8.40) remained independent predictors of suicidality.

**Conclusion:** The high rate of suicidality identified in this study is of major concern. Alongside emerging evidence on the potential of psychedelic-assisted therapy to treat some mental illness and addiction issues, our findings demonstrate that naturalistic psychedelic drug use is independently associated with reduced suicidality, while other illicit drug use and childhood trauma predispose women to suicidality. While observational, this study supports calls for further investigation of the therapeutic utility of psychedelic drugs in treating poor mental health and promoting mental wellness.

**Word Count:** 278

**Keywords:** *women, psychedelics, hallucinogens, suicide prevention, mental health, substance use*

### Strengths and limitations of this study

- To the best of our knowledge, this is the first study to longitudinally investigate the potential protective effect of psychedelic drug use on suicidality, drawing from a large, community-based cohort of marginalized women.
- Multivariable Cox regression analyses were used to examine the impact of lifetime psychedelic drug use on incidence of suicidality among a marginalized population.
- The associations between specific psychedelics, contexts of their use, and suicidality were not explored in this study.
- Not all potential confounding variables could be controlled for in this study and the associations uncovered cannot be determined as causal.
- Data were self-reported and variables examined included highly stigmatized topics, introducing the potential for recall bias, social desirability and reporting bias.

## INTRODUCTION

Despite efforts to improve mental health over the last 60 years, suicide remains a critical public health concern worldwide [1,2]. Suicide was the second leading cause of death globally in 2012 among 15-29 year olds [2], with an estimated 80-90% of suicide deaths attributable to mental health or substance use disorders [3,4]. Significant gaps remain in empirical research examining suicidality among marginalized populations. Marginalized women, such as sex workers who are street-involved or use drugs, experience disproportionately high levels of social and health-related risks and harms, including stigma, discrimination, and violence [5–7] as a result of dynamic structural drivers including poverty, criminalization, and racism. While sex workers are a diverse population working from indoor in-call and out-call venues to street-based settings, previous studies highlight substantial unmet mental health needs of more marginalized and street-involved sex workers. Studies among street-based sex workers and those who use drugs underscore the associations of social exclusion, depression, and post-traumatic stress disorder (PTSD) with suicidality [8–12]. Research demonstrates greater risk for suicidality among those with a history of trauma [1,13,14] and among street-involved sex workers who report historical experiences of violence and childhood abuse [8–10,15,16]. Further, Indigenous women are vastly overrepresented among street-based sex workers in North America, and face devastating and multigenerational effects of trauma and socio-economic dislocation (e.g., high burden of mental illness and suicidality) as a result of colonialism, racialized policies, and displacement from land and home communities [17,18].

Various biological, interpersonal, and socio-structural factors (e.g., social exclusion/isolation, education level, employment) contribute to our understanding of suicidal behaviors [1,19]. While



1  
2  
3 evidence has demonstrated that some forms of cognitive behavioral therapy and pharmacological  
4 interventions may reduce suicidality, the literature is hampered by publication bias and  
5 significant heterogeneity of strategies and outcome measures [14,20]. Due to ethical challenges  
6 and limitations to studying suicide and its proxies (i.e., ideation and attempts), there remains a  
7 paucity of evidence from randomized controlled trials to support the efficacy of prevention  
8 interventions [20]. Researchers have largely focused on examining suicidality outcomes (rather  
9 than suicide itself), which may not be fully generalizable to understanding suicide or accurately  
10 evaluating treatment approaches [21]. Further, stigma continues to hinder research and reporting  
11 of suicidality [21]. There remains an urgency to better understand pathways to suicidality, with  
12 literature highlighting the need for innovative psychological and psychosocial treatments [14]  
13 and tailored intervention approaches for key marginalized populations [20,21]. Given the  
14 complex etiological pathways to suicide and limited effectiveness of well-established evidence-  
15 based interventions to reduce the burden of suicidality, the US National Institute of Mental  
16 Health has called for innovative research on suicide prevention and treatment for suicidality [22].  
17  
18  
19  
20  
21  
22  
23  
24  
25  
26  
27  
28  
29  
30  
31  
32  
33  
34  
35  
36  
37  
38

39 A number of psychedelic drug therapies are being revisited following a 40-year hiatus in  
40 research into their potential for the treatment of depression, anxiety, PTSD, eating disorders, and  
41 addiction [23]. Psychedelic drugs include the classic serotonergic psychedelics or  
42 “hallucinogens” lysergic acid diethylamide (LSD), psilocybin, dimethyltryptamine (DMT), and  
43 mescaline, as well as the “enactogen” or “empathogen” methylenedioxyamphetamine  
44 (MDMA) [23–25], all of which are being investigated in clinical/pre-clinical studies for their  
45 neuropharmacological functions and potential as adjuncts to psychotherapy [26–28]. While  
46 renewed interest in psychedelic medicine is challenged by various funding, methodological, and  
47  
48  
49  
50  
51  
52  
53  
54  
55  
56  
57  
58  
59  
60

1  
2  
3 legal impediments, the emerging evidence indicating improved outcomes for some individuals  
4 suffering from mental health and addiction issues has generated new scientific inquiry and an  
5 imposing obligation to advance this research [23,29,30]. Recent observational studies in the US  
6 demonstrate significant associations between lifetime psychedelic use and reduced recidivism  
7 and intimate partner violence among populations of prison inmates [31,32], and reduced  
8 psychological distress and suicidality among the general adult population [33–35].  
9  
10  
11  
12  
13  
14  
15  
16  
17  
18  
19

20 Despite the multifaceted structural and social inequities that shape poor mental health burden  
21 among marginalized and street-involved sex workers, there remains a paucity of data on suicide  
22 rates and research that systematically examines factors that potentiate or mitigate suicidality  
23 among sex workers, particularly in the global north. Some evidence suggests that psychedelic  
24 drug use may be protective with regard to suicidality [33–35] and is associated with significant  
25 improvements in psychological wellbeing and reductions in depression and anxiety in clinical  
26 settings [36–41], yet existent research is characterized by large gaps. Given the urgency of  
27 addressing and preventing suicide and calls for prioritizing innovative interventions, this study  
28 aimed to longitudinally investigate whether lifetime psychedelic drug use is associated with a  
29 reduced incidence of suicidality (suicide ideation or attempts) among a community-based  
30 prospective cohort of marginalized women. We postulated that psychedelic drug use would have  
31 an independent protective effect on suicidality over the study period.  
32  
33  
34  
35  
36  
37  
38  
39  
40  
41  
42  
43  
44  
45  
46  
47  
48  
49

## 50 **METHODS**

### 51 **Study Design and Participants**

52  
53  
54  
55  
56  
57  
58  
59  
60

1  
2  
3 Data for this study were drawn from a large, community-based, prospective cohort of women sex  
4 workers initiated in 2010, known as AESHA (An Evaluation of Sex Workers Health Access).  
5  
6 Eligibility criteria for study participants included cisgender or transgender women, 14 years of  
7  
8 age or older, who exchanged sex for money within the last 30 days. AESHA participants  
9  
10 completed interviewer-administered questionnaires and HIV/STI/HCV serology testing at  
11  
12 enrollment and biannually. Experiential staff (current/former sex workers) are represented across  
13  
14 interview, outreach and nursing teams, including coordinators with substantial community  
15  
16 experience. Participants were recruited across Metro Vancouver using time-location sampling  
17  
18 and community mapping strategies, with day and late-night outreach to outdoor sex work  
19  
20 locations (i.e., streets, alleyways), indoor sex work venues (i.e., massage parlors, micro-brothels,  
21  
22 and in-call locations), and online. Weekly outreach by experiential staff is conducted to over 100  
23  
24 sex work venues by outreach/nursing teams operating a mobile van, with regular contact as well  
25  
26 as encouraging drop-in to women-only spaces at the research office, contributing to an annual  
27  
28 retention rate of >90% for AESHA participants.  
29  
30  
31  
32  
33  
34  
35  
36  
37  
38

39 The main interview questionnaire elicits responses related to socio-demographics (e.g., sexual  
40 and gender identities, ethnicity, housing), the work environment (e.g., access to services,  
41 violence/safety, policing, incarceration), client characteristics (e.g., types/fees of services, male  
42 condom use), intimate partners (e.g., sexual history, cohabitation, financial support), trauma and  
43 violence (e.g., lifetime and childhood trauma, exposure to intimate partner and workplace  
44 violence), and comprehensive injection and non-injection drug use patterns. The clinical  
45  
46 questionnaire relates to overall physical, mental, and emotional health, and HIV testing and  
47  
48 treatment experiences to support education, referral, and linkages with care. The research team  
49  
50  
51  
52  
53  
54  
55  
56  
57  
58  
59  
60

works in close partnership with the affected community and a diversity of stakeholders (e.g., legal/human rights experts, community-based organizations, service providers, health authorities, government officials, and international policy bodies) and regularly engages in knowledge exchange efforts. AESHA is monitored by a Community Advisory Board of over 15 sex work, women's health and HIV service agencies, as well as representatives from the health authority and policy experts, and holds ethical approval through Providence Health Care/University of British Columbia Research Ethics Board. All participants receive an honorarium of \$40 CAD at each bi-annual visit for their time, expertise and travel.

To capture initial episodes of suicidality, analyses for this study were restricted to AESHA participants who had never thought about or attempted suicide at baseline and completed at least one follow-up visit between January 2010 and August 2014. Those with missing observations for suicidality at baseline (n=50/766; 6.5%) were excluded from analysis, and one additional participant was excluded because reported suicidality was missing at follow-up.

### Statistical Analyses

The outcome of interest was a first episode of suicidality, defined as responding 'yes' to having thought about or attempted suicide in the last six months. Time-fixed variables examined included age (continuous), gender/sexual minority (lesbian, gay, bisexual, trans, or two-spirit), Indigenous ancestry (inclusive of First Nations, Métis, and Inuit), being an im/migrant worker (versus Canadian born), education (high school or greater), and physical and/or sexual childhood abuse (before age 18). Variables treated as time-updated covariates based on bi-annual follow-up data included HIV/STI serostatus, recent homelessness, recent physical and/or sexual violence

1  
2  
3 by clients, recent police harassment and/or arrest, and primary place to solicit clients. Time-  
4  
5 updated injection and non-injection drug use variables included lifetime use of psychedelics  
6  
7 (including LSD/acid, magic mushrooms/psilocybin, ecstasy/MDMA), cannabis, pharmaceutical  
8  
9 opioids (any street methadone/suboxone, dilaudid, morphine, oxycontin,  
10  
11 percocet/vicodin/demerol, or T3s/T4s), crack, cocaine, crystal methamphetamine, and heroin.  
12  
13

14  
15  
16  
17 Using extended Cox regression, unadjusted and adjusted hazard ratios (HR and AHR) and 95%  
18  
19 confidence intervals (CI) were calculated to identify predictors of suicidality. Psychedelic drug  
20  
21 use, hypothesized a priori to be a predictor of suicidality, and variables that were significantly  
22  
23 correlated with the outcome at the  $p < 0.10$  level in bivariate analyses were subsequently fitted  
24  
25 into a multivariable Cox model. Backward model selection was used to determine the final  
26  
27 multivariable model with the best overall fit, as indicated by the lowest Akaike information  
28  
29 criterion (AIC) value. A complete case analysis was used, where observations with missing data  
30  
31 were excluded from analyses, and participants who were lost to follow-up were right censored at  
32  
33 their most recent study visit. All statistical analyses were performed using SAS software version  
34  
35 9.4 (SAS Institute, Cary, NC, USA). Two-sided p-values are reported.  
36  
37  
38  
39  
40  
41  
42

## 43 RESULTS

### 44 Socio-Demographic Characteristics

45  
46 Of the total 766 women who completed the baseline questionnaire, 46% (n=355) reported ever  
47  
48 experiencing suicidality (45%; n=343 reported suicidal thoughts, 32%; n=245 attempted suicide)  
49  
50 and were thus excluded from this analysis. A total of 290 women without suicidality who  
51  
52 completed at least one follow-up visit were eligible for inclusion in the present analysis.  
53  
54  
55  
56  
57  
58  
59  
60

1  
2  
3 Participants were followed for a total of 53.5 months (median = 29.9 months). Baseline  
4 characteristics of participants who reported suicidality during follow-up compared to those who  
5 did not are displayed in Table 1.  
6  
7  
8  
9

10  
11  
12 Overall, 11% (n=31) thought about or attempted suicide for the first time during follow-up, with  
13 an incidence density of 4.42 per 100 person-years (95%CI 3.10 to 6.30). The median age was 36  
14 (interquartile range [IQR] 29 to 42) and 16% (n=45) of participants identified as gender or sexual  
15 minorities. One third (n=93) identified as Indigenous and one quarter (n=73) had been homeless  
16 in the last six months. Half of participants (49%; n=142) solicited clients on the streets, and 37%  
17 (n=106) solicited clients in indoor establishments. In terms of workplace violence and  
18 harassment, 14% (n=41) and 37% (n=107) reported recent exposure to physical and/or sexual  
19 violence from clients/dates and recent police harassment without arrest, respectively. Nearly half  
20 (47%; n=136) of participants reported ever being physically and/or sexually abused before age  
21 18, and among those who reported suicidality, 77% (n=24/31) experienced childhood abuse  
22 compared to 43% (n=112/259) among those who did not report suicidality (p<0.001).  
23  
24  
25  
26  
27  
28  
29  
30  
31  
32  
33  
34  
35  
36  
37  
38  
39  
40

### 41 **Substance Use**

42  
43 Over half of participants reported ever using crack (63%, n=184) or cocaine (56%; n=162), with  
44 higher proportions of crack and cocaine use among those reporting suicidality than those who did  
45 not (p=0.003). Close to half (49%, n=141) reported lifetime heroin use, which was significantly  
46 higher among those who reported suicidality than those who did not (68% vs. 46%, p=0.02).  
47  
48 Approximately one third (31%, n=90) of participants had ever used crystal methamphetamine,  
49 and this was significantly higher among those who reported suicidality than those who did not  
50  
51  
52  
53  
54  
55  
56  
57  
58  
59  
60

1  
2  
3 (58% vs. 28%,  $p<0.001$ ). Overall, 27% ( $n=79$ ) of participants reported ever using a psychedelic  
4  
5 substance, and of those, 75% ( $n=59$ ) had used MDMA/ecstasy, 35% ( $n=28$ ) had used LSD/acid,  
6  
7 and 30% ( $n=24$ ) had used psilocybin/magic mushrooms.  
8  
9

### 10 11 12 **Bivariate and Multivariable Cox Analyses**

13  
14  
15 Unadjusted and adjusted hazard ratios for factors associated with a first episode of suicidality  
16  
17 during follow-up are displayed in Table 2. In the final multivariable model, crystal  
18  
19 methamphetamine use (AHR 3.25; 95%CI 1.47 to 7.21) and physical and/or sexual childhood  
20  
21 abuse (AHR 3.54; 95%CI 1.49 to 8.40) remained independently associated with time to  
22  
23 suicidality. Psychedelic use was associated with a 60% reduced hazard of suicidality (AHR 0.40;  
24  
25 95%CI 0.17 to 0.94).  
26  
27  
28  
29  
30  
31

### 32 **DISCUSSION**

33  
34 This study demonstrated that among marginalized women, many of whom are street-involved  
35  
36 and experience a disproportionate burden of violence, trauma, psychological distress and suicide,  
37  
38 naturalistic psychedelic drug use predicted a significantly reduced hazard for suicidality. Crystal  
39  
40 methamphetamine use and childhood abuse predisposed women to suicidality corresponding to  
41  
42 more than a three-fold increased hazard. Suicidality was highly prevalent, with almost half of  
43  
44 women reporting lifetime suicidality at baseline, and 11% reporting a first episode of suicidality  
45  
46 in the last six months during follow-up. Few studies have longitudinally examined predictors of  
47  
48 suicidality among marginalized sex workers, and of the available data, most are cross-sectional  
49  
50 and/or conducted in lower and middle income settings [8,16,42,43]. The present study, based on  
51  
52 a community-based, prospective cohort of marginalized women, adds to a growing body of  
53  
54  
55  
56  
57  
58  
59  
60

1  
2  
3 literature documenting the protective and therapeutic potentials of psychedelic substances  
4  
5 [23,29,39,44,45].  
6  
7  
8  
9

10 Data were self-reported, and questions pertaining to events that occurred in the past may  
11 be subject to recall bias. Variables examined included sensitive and highly stigmatized topics  
12 such as childhood trauma, violence, and illicit drug use, which introduce the potential for social  
13 desirability and reporting bias. However, the likelihood of these biases is reduced by the  
14 community-based nature of the study. While lifetime psychedelic drug use was found to reduce  
15 the hazard of suicidality, the associations uncovered in this analysis cannot be determined as  
16 causal. However, the use of Cox regression analysis in this study was able to determine a  
17 temporal relationship between psychedelic use and suicidality. The sample was restricted to  
18 participants who had not experienced suicidal ideation or attempt at baseline, ensuring that  
19 psychedelic use preceded suicidality and thus providing evidence that psychedelics have a  
20 protective effect. Due to a lack of statistical power, analyses evaluating the effects of more  
21 nuanced indicators of psychedelic use (e.g., frequency of use or recent use), as well as separate  
22 analyses for ideation and attempt outcomes, were not feasible. Further examination of these  
23 variables would certainly be interesting and important in future analyses with additional data  
24 from follow-up questionnaires. Suicidality is influenced by complex individual, interpersonal  
25 and structural variables, and not all potential confounding variables could be controlled for in  
26 this study. For example, women who use psychedelics may also possess some characteristic(s)  
27 associated with a reduced likelihood of being suicidal (e.g., openness to experience, curiosity, or  
28 spirituality), which were not examined in this study. Despite the relative safety of psychedelic  
29 drug use as evidenced from the clinical and non-clinical literature [36,46–49], it should be noted  
30  
31  
32  
33  
34  
35  
36  
37  
38  
39  
40  
41  
42  
43  
44  
45  
46  
47  
48  
49  
50  
51  
52  
53  
54  
55  
56  
57  
58  
59  
60



1  
2  
3 that the use of psychedelics, particularly with unknown doses sourced from unregulated street  
4 markets, is not without risk, highlighting the importance of set and setting [23]; the doses and  
5 contexts of psychedelic use among women in the present study could not be determined. The  
6 standard error for the association between psychedelic use and suicidality was somewhat high,  
7 resulting in a wider confidence interval. However, a large and significant protective effect was  
8 demonstrated in multivariable analysis, despite the relatively small number of events for  
9 suicidality over follow-up. With a larger sample size, we would expect a narrower confidence  
10 interval for this association. The study population included women from a wide-ranging  
11 representation of sex work environments, yet findings may not be fully generalizable to sex  
12 workers in other settings. The mapping of working areas and time–location sampling helped to  
13 ensure a representative sample and to minimize selection bias.  
14  
15  
16  
17  
18  
19  
20  
21  
22  
23  
24  
25  
26  
27  
28  
29  
30  
31

32 To the best of our knowledge, this study is the first to longitudinally investigate associations with  
33 suicidality among marginalized and street-involved sex workers in North America, and builds  
34 upon prior cross-sectional research highlighting significantly elevated rates of suicidality and  
35 unmet mental health needs in this population. For example, a study conducted in Sydney,  
36 Australia demonstrated significant links between depression, trauma, and suicidality, where an  
37 estimated 42% of street-based female sex workers reported attempting suicide and 74% reported  
38 lifetime suicidal ideation [10,42]. While estimates of mental illness vary significantly across sex  
39 work settings, up to three-quarters of street- and drug-involved sex workers in a US study  
40 reported severe depression, anxiety, or PTSD [12]. Notably, our study demonstrated a lower risk  
41 of suicidality among women working indoors in bivariate analysis (HR 0.19,  $p=0.009$ ), lending  
42 support to the critical role of safer workplace environments in mitigating risk. In studies  
43  
44  
45  
46  
47  
48  
49  
50  
51  
52  
53  
54  
55  
56  
57  
58  
59  
60

1  
2  
3 conducted in Asia, recent suicide attempts ranged from 19% among sex workers in Goa, India  
4 [16] to 38% among sex workers in China [8,11,50], many of whom work in marginalized  
5  
6 [16] to 38% among sex workers in China [8,11,50], many of whom work in marginalized  
7  
8 settings with few workplace protections. Transgender women involved in sex work, a sub-  
9  
10 population experiencing significant psychosocial vulnerability and discrimination, report notably  
11  
12 further elevated rates of suicidality: three quarters of participants in San Francisco reported  
13  
14 suicide ideation, of whom 64% attempted suicide [51]. The global evidence is unequivocal that  
15  
16 in settings where sex work is criminalized, sex workers are unable to access essential social,  
17  
18 health, and legal protections (e.g., against violence), highlighting the need for structural (e.g.,  
19  
20 decriminalization) and community-led interventions to improve health and human rights [5]. A  
21  
22 structural approach to mitigating suicidality risk requires a reform of laws and policies that  
23  
24 perpetuate stigma, discrimination, violence, and unequal access to health and social supports  
25  
26 among sex workers. Increased support for community-driven interventions that are gender and  
27  
28 culturally appropriate are urgently needed, and any clinical treatment utilizing psychedelics must  
29  
30 be developed alongside sex worker-led interventions and community empowerment.  
31  
32  
33  
34  
35  
36  
37  
38

39 Our findings extend upon research on associations between lifetime use of illicit drugs and  
40  
41 increased risk for suicidality: in bivariate analysis, all classes of illicit drugs were demonstrated  
42  
43 to increase the hazard of suicidality with the exception of psychedelics. In multivariable analysis,  
44  
45 psychedelics were independently associated with a 60% reduced hazard for suicidality,  
46  
47 contributing to emergent evidence on the potential of psychedelics to mitigate risks for suicide.  
48  
49

50 Among the various scientific studies examining the potential benefits of psychedelic drug use, a  
51  
52 recent and large (n>190,000) population study conducted among adult respondents in the US  
53  
54 demonstrated that psychedelics are associated with reduced psychological distress and suicidality  
55  
56  
57  
58  
59  
60

1  
2  
3 [33]. A recent open-label trial conducted in the UK demonstrated the safety and efficacy of  
4  
5 psilocybin for treating major depression [36], and another open-label trial in Brazil found rapid  
6  
7 and sustained anti-depressant effects from the Amazonian psychedelic brew ayahuasca  
8  
9 administered in a clinical setting [38]. The ways in which psychedelics may alleviate suffering  
10  
11 associated with some mental illness is undoubtedly a complex phenomenon. It has been  
12  
13 hypothesized that psychedelics modify neurobiological processes that may be involved in  
14  
15 suicidality by down-regulating 5-HT<sub>2A</sub> serotonin receptors, as increased binding (and up-  
16  
17 regulation) of this receptor has been implicated in major depression and suicide [39,45,52].  
18  
19 Further, there is evidence that psychedelics alter neural network connectivity and enhance recall  
20  
21 of autobiographical memories, which may facilitate positive reprocessing of trauma [26,53,54].  
22  
23 Recent randomized, placebo-controlled, cross-over studies found that psilocybin (among n=25  
24  
25 adults) and LSD (among n=20 adults) were associated with increased positive mood and  
26  
27 psychological wellbeing [37,39], supporting other work demonstrating the anti-  
28  
29 depressive/anxiolytic effects of psychedelics [27,40,46,55]. The potential of psychedelics to  
30  
31 elicit “mystical-type” experiences, with profound and sustained positive changes in attitudes and  
32  
33 mood, may play a key role in addiction treatment interventions [41,45,56,57]. For example,  
34  
35 psilocybin-assisted psychotherapy demonstrated high success in smoking cessation outcomes at  
36  
37 six months follow-up (abstinence rates of 80%), and mystical experiences generated from the  
38  
39 psilocybin sessions were significantly correlated with elevated ratings of personal  
40  
41 meaningfulness, wellbeing, and life satisfaction [58]. Randomized control trials in the US and  
42  
43 Switzerland have demonstrated significant long-term improvements among patients with  
44  
45 treatment-resistant PTSD following MDMA-assisted psychotherapy [28,59], and further research  
46  
47 is continuing in an international multi-site phase 3 clinical trial.  
48  
49  
50  
51  
52  
53  
54  
55  
56  
57  
58  
59  
60

1  
2  
3  
4  
5  
6 Marginalized and street-based sex workers experience complex and synergistic effects between  
7  
8 trauma, lack of workplace safety, and mental health/substance use comorbidities that elevate risk  
9  
10 of suicidality. Marginalized women and sex workers who use drugs report high rates of  
11  
12 childhood abuse [60–62], which is associated with an increased likelihood of experiencing  
13  
14 subsequent physical or sexual violence, as well as initiating injection drug use [63–65]. For those  
15  
16 suffering from emotional trauma stemming from violence, including indirect violence (i.e.,  
17  
18 witnessing violence), there may be a proclivity to use drugs for self-medication [66,67]. Violence  
19  
20 and sexual coercion have been found to be significantly associated with suicidality among sex  
21  
22 worker populations in China and India [8,9,16,68]. As demonstrated in this study, having an  
23  
24 early traumatic life event is a key risk factor for suicide among sex workers, a high proportion of  
25  
26 whom are Indigenous, and experiencing historical trauma can have harmful intergenerational  
27  
28 impacts [1,17]. Given that historical experiences of violence and trauma denote significant risk  
29  
30 for suicide, there is an urgent need to provide integrated, trauma-informed intervention services  
31  
32 for sex workers and other marginalized populations. Currently available interventions and  
33  
34 pharmacological treatments for suicidality show limited efficacy, and concerted efforts should be  
35  
36 made not only to increase access to evidence-based treatments, but also to explore alternative  
37  
38 approaches to improving mental health and wellbeing. Emerging research and evidence show  
39  
40 positive outcomes with psychedelic-assisted treatments, which have demonstrated an excellent  
41  
42 record of safety with few to no serious adverse effects reported [23,27,36,69]. This study  
43  
44 suggests psychedelic substances may hold promise as useful tools in addressing mental health  
45  
46 issues and remediating risks for psychological distress and suicide.  
47  
48  
49  
50  
51  
52  
53  
54  
55  
56  
57  
58  
59  
60

## CONCLUSION

The high rate of suicidality among marginalized women identified in this study is a critical public health concern. In the context of emerging research and evidence on the therapeutic potential of psychedelics to treat mental health issues, our findings demonstrated that naturalistic psychedelic use was independently associated with reduced suicidality among sex workers, while other drug use and childhood trauma increased the hazard for suicidality. To the best of our knowledge, this is the first study to longitudinally investigate the relationship between psychedelic drug use and suicidality. While observational, this study supports calls for further investigation of the therapeutic utility of psychedelic drugs in treating mental illness and promoting mental wellness.

1  
2  
3 **Acknowledgments:** We thank all those who contributed their time and expertise to this project,  
4 particularly participants, AESHA community advisory board members and partner agencies, and  
5 the AESHA team, including: Sarah Moreheart, Jennifer Morris, Sylvia Machat, Jane Li, Minshu  
6 Mo, Sherry Wu, Sylvia Machat, Emily Leake, Anita Dhanoa, Meaghan Thumath, Alka Murphy,  
7 Jenn McDermid, Tave Cole, Jaime Adams. We also thank Abby Rolston, Peter Vann, Erin  
8 Seatter and Patricia McDonald for their research and administrative support  
9  
10

11  
12 **Contributors:** EA and KS conceptualized and designed the study. EA, SAS, MB, and KS  
13 contributed to the interpretation and analysis of data. EA wrote the first draft of the manuscript.  
14 SAS, KT, MB, EW and KS contributed to reviewing and editing the manuscript. EA, SAS, KT,  
15 MB, EW and KS critically revised the manuscript and approved the final draft. KS is the  
16 guarantor.  
17  
18  
19  
20

21 **Funding:** This study was supported by the US National Institutes of Health (R01DA028648) and  
22 MacAIDS. KS is partially supported by a Canada Research Chair in Global Sexual Health and  
23 HIV/AIDS and the Michael Smith Foundation for Health Research. EA is supported by a  
24 Canadian Institutes of Health Research Doctoral Award. SAS is partially supported by a NIDA  
25 merit award (R37DA019829). EW is supported in part by a Tier 1 Canada Research Chair in  
26 Inner-City Medicine award. The study funders had no role in the study design, data collection,  
27 analysis, interpretation, writing of the report, or decision to submit the paper for publication.  
28  
29  
30

31 **Competing interests:** All authors have completed the ICMJE uniform disclosure form  
32 at [www.icmje.org/coi\\_disclosure.pdf](http://www.icmje.org/coi_disclosure.pdf) (available on request from the corresponding author) and  
33 declare: no support from any organisation for the submitted work; no financial relationships with  
34 any organisations that might have an interest in the submitted work in the previous three years;  
35 no other relationships or activities that could appear to have influenced the submitted work.  
36  
37

38 **Ethical approval:** This study holds ethical approval through Providence Health Care/University  
39 of British Columbia Research Ethics Board.  
40

41 **Transparency:** The study guarantor (KS) affirms that the manuscript is an honest, accurate, and  
42 transparent account of the study being reported; that no important aspects of the study have been  
43 omitted; and that any discrepancies with the study as planned have been explained.  
44  
45

46 **Data sharing:** no additional data available.  
47  
48  
49  
50  
51  
52  
53  
54  
55  
56  
57  
58  
59  
60

## REFERENCES

- 1 Hawton K, van Heeringen K. Suicide. *Lancet* 2009;**373**:1372–81.
- 2 World Health Organization. Preventing Suicide: A Global Imperative. Geneva, Switzerland: 2014. [http://www.who.int/mental\\_health/suicide-prevention/world\\_report\\_2014/en/](http://www.who.int/mental_health/suicide-prevention/world_report_2014/en/) (accessed Dec 2016).
- 3 Whiteford HA, Degenhardt L, Rehm J, *et al*. Global burden of disease attributable to mental and substance use disorders: Findings from the Global Burden of Disease Study 2010. *Lancet* 2013;**382**:1575–86.
- 4 Statistics Canada. Suicide Rates: An Overview. Ottawa: 2015. <http://www.statcan.gc.ca/pub/82-624-x/2012001/article/11696-eng.htm> (accessed Dec 2016).
- 5 Shannon K, Strathdee SA, Goldenberg SM, *et al*. Global epidemiology of HIV among female sex workers: Influence of structural determinants. *Lancet* 2015;**385**:55–71.
- 6 Argento E, Muldoon K, Duff P, *et al*. High prevalence and partner correlates of physical and sexual violence by intimate partners among street and off-street sex workers. *PLoS One* 2014;**9**:e102129.
- 7 Deering K, Amin A, Shoveller J, *et al*. A systematic review of the global magnitude and drivers of violence against sex workers. *Am J Public Health* 2014;**104**:e42–54.
- 8 Gu J, Lau JTF, Li M, *et al*. Socio-ecological factors associated with depression, suicidal ideation and suicidal attempt among female injection drug users who are sex workers in China. *Drug Alcohol Depend* 2014;**144**:102–10.
- 9 Zhang L, Li X, Wang B, *et al*. Violence, stigma and mental health among female sex workers in China: a structural equation modeling. *Women Health* 2016;**242**.
- 10 Roxburgh A, Degenhardt L, Copeland J. Posttraumatic stress disorder among female street-based sex workers in the greater Sydney area, Australia. *BMC Psychiatry* 2006;**6**:1–12.
- 11 Lau JTF, Tsui HY, Ho SPY, *et al*. Prevalence of psychological problems and relationships with condom use and HIV prevention behaviors among Chinese female sex workers in Hong Kong. *AIDS Care* 2010;**22**:659–68.
- 12 Surratt HL, Kurtz SP, Chen M, *et al*. HIV risk among female sex workers in Miami: the impact of violent victimization and untreated mental illness. *AIDS Care* 2012;**24**:553–61.
- 13 Hadland SE, Marshall BDL, Kerr T, *et al*. Suicide and history of childhood trauma among street youth. *J Affect Disord* 2012;**136**:377–80.
- 14 O'Connor RC, Nock MK. The psychology of suicidal behaviour. *The Lancet Psychiatry* 2014;**1**:73–85.
- 15 Gilchrist G, Gruer L, Atkinson J. Comparison of drug use and psychiatric morbidity between prostitute and non-prostitute female drug users in Glasgow, Scotland. *Addict Behav* 2005;**30**:1019–23.
- 16 Shahmanesh M, Wayal S, Cowan F, *et al*. Suicidal behavior among female sex workers in Goa, India: The silent epidemic. *Am J Public Health* 2009;**99**:1239–46.
- 17 Bingham B, Leo D, Zhang R, *et al*. Generational sex work and HIV risk among Indigenous women in a street-based urban Canadian setting. *Cult. Health Sex.* 2014;**16**:440–52.
- 18 Benoit C, Carroll D, Chaudhry M. In search of a Healing Place: Aboriginal women in Vancouver's Downtown Eastside. *Soc Sci Med* 2003;**56**:821–33.

- 1  
2  
3  
4  
5  
6  
7  
8  
9  
10  
11  
12  
13  
14  
15  
16  
17  
18  
19  
20  
21  
22  
23  
24  
25  
26  
27  
28  
29  
30  
31  
32  
33  
34  
35  
36  
37  
38  
39  
40  
41  
42  
43  
44  
45  
46  
47  
48  
49  
50  
51  
52  
53  
54  
55  
56  
57  
58  
59  
60
- 19 Li Z, Page A, Martin G, *et al.* Attributable risk of psychiatric and socio-economic factors for suicide from individual-level, population-based studies: A systematic review. *Soc Sci Med* 2011;**72**:608–16.
- 20 Zalsman G, Hawton K, Wasserman D, *et al.* Suicide prevention strategies revisited: 10-year systematic review. *The Lancet Psychiatry* 2016;**3**:646–59.
- 21 Klonsky ED, May AM, Saffer BY. Suicide, Suicide Attempts, and Suicidal Ideation. *Annu Rev Clin Psychol* 2016;**12**:307–30.
- 22 National Action Alliance for Suicide Prevention: Research Prioritization Task Force. A Prioritized Research Agenda for Suicide Prevention: An Action Plan to Save Lives. Rockville, MD: 2014. [www.suicide-research-agenda.org](http://www.suicide-research-agenda.org) (accessed Dec 2016).
- 23 Tupper K, Wood E, Yensen R, *et al.* Psychedelic medicine: a re-emerging therapeutic paradigm. *Can Med Assoc J* 2015;**187**:1054–9.
- 24 Nichols DE. Hallucinogens. *Pharmacol Ther* 2004;**101**:131–81.
- 25 Bedi G, Hyman D, De Wit H. Is ecstasy an ‘empathogen’? Effects of 3,4-methylenedioxymethamphetamine on prosocial feelings and identification of emotional states in others. *Biol Psychiatry* 2010;**68**:1134–40.
- 26 Carhart-Harris RL, Leech R, Williams TM, *et al.* Implications for psychedelic-assisted psychotherapy: Functional magnetic resonance imaging study with psilocybin. *Br J Psychiatry* 2012;**200**:238–44.
- 27 dos Santos RG, Osorio FL, Crippa JAS, *et al.* Antidepressive, anxiolytic, and antiaddictive effects of ayahuasca, psilocybin and lysergic acid diethylamide (LSD): a systematic review of clinical trials published in the last 25 years: antidepressive effects of ayahuasca, psilocybin and LSD. *Ther Adv Psychopharmacol* 2016;**6**:193-213.
- 28 Oehen P, Schnyder U. A randomized, controlled pilot study of MDMA ( $\pm$  3,4-methylenedioxymethamphetamine)-assisted psychotherapy for treatment of resistant, chronic Post-Traumatic Stress Disorder (PTSD). *J Psychopharmacol* 2013;**27**:40–52.
- 29 Sessa B. Shaping the renaissance of psychedelic research. *Lancet* 2012;**380**:200–1.
- 30 Sessa B, Johnson MW. Can psychedelic compounds play a part in drug dependence therapy? *Br J Psychiatry* 2015;**206**:1–3.
- 31 Hendricks PS, Clark CB, Johnson MW, *et al.* Hallucinogen use predicts reduced recidivism among substance-involved offenders under community corrections supervision. *J Psychopharmacol* 2014;**28**:62–6.
- 32 Walsh Z, Hendricks PS, Smith S, *et al.* Hallucinogen use and intimate partner violence: Prospective evidence consistent with protective effects among men with histories of problematic substance use. *J Psychopharmacol* 2016;**30**:601-607.
- 33 Hendricks PS, Thorne CB, Clark CB, *et al.* Classic psychedelic use is associated with reduced psychological distress and suicidality in the United States adult population. *J Psychopharmacol* 2015;**29**:280–8.
- 34 Krebs TS, Johansen P-Ø. Psychedelics and mental health: a population study. *PLoS One* 2013;**8**:e63972. doi:10.1371/journal.pone.0063972
- 35 Johansen P-Ø, Krebs TS. Psychedelics not linked to mental health problems or suicidal behavior: A population study. *J Psychopharmacol* 2015;**29**:270–9.
- 36 Carhart-Harris RL, Bolstridge M, Rucker J, *et al.* Psilocybin with psychological support for treatment-resistant depression: An open-label feasibility study. *The Lancet Psychiatry* 2016;**3**:619–27.
- 37 Carhart-Harris R, Kaelen M, Bolstridge M, *et al.* The paradoxical psychological effects of



- 1  
2  
3 lysergic acid diethylamide (LSD). *Psychol Med* 2016;1–12.  
4 doi:10.1017/S0033291715002901  
5  
6 38 Sanches R, de Lima Osorio F, dos Santos R, *et al*. Antidepressant effects of a single dose  
7 of ayahuasca in patients with recurrent depression: A SPECT study. *J Clin*  
8 *Psychopharmacol* 2016;**36**:77–81.  
9  
10 39 Kraehenmann R, Preller KH, Scheidegger M, *et al*. Psilocybin-induced decrease in  
11 amygdala reactivity correlates with enhanced positive mood in healthy volunteers. *Biol*  
12 *Psychiatry* 2015;**78**:572–81.  
13  
14 40 Grob CS, Danforth AL, Chopra GS, *et al*. Pilot study of psilocybin treatment for anxiety  
15 in patients with advanced-stage cancer. *Arch Gen Psychiatry* 2011;**68**:71–8.  
16  
17 41 Griffiths RR, Johnson MW, Richards WA, *et al*. Psilocybin occasioned mystical-type  
18 experiences: Immediate and persisting dose-related effects. *Psychopharmacology (Berl)*  
19 2011;**218**:649–65.  
20  
21 42 Roxburgh A, Degenhardt L, Copeland J, *et al*. Drug dependence and associated risks  
22 among female street-based sex workers in the Greater Sydney Area, Australia. *Subst Use*  
23 *Misuse* 2008;**43**:1202–17.  
24  
25 43 Hong Y, Zhang C, Li X, *et al*. Partner violence and psychosocial distress among female  
26 sex workers in China. *PLoS One* 2013;**8**:e62290. doi:10.1371/journal.pone.0062290  
27  
28 44 Dyck E. LSD: A new treatment emerging from the past. *Can Med Assoc J*  
29 2015;**187**:1079–80.  
30  
31 45 Bogenschutz MP, Johnson MW. Classic hallucinogens in the treatment of addictions.  
32 *Prog Neuro-Psychopharmacology Biol Psychiatry* 2015;**64**:250–8.  
33  
34 46 Gasser P, Holstein D, Michel Y, *et al*. Safety and efficacy of lysergic acid diethylamide-  
35 assisted psychotherapy for anxiety associated with life-threatening diseases. *J Nerv Ment*  
36 *Dis* 2014;**202**:513–20.  
37  
38 47 Mithoefer, Wagner M, Mithoefer A, *et al*. The safety and efficacy of  $\pm$ 3,4-  
39 methylenedioxymethamphetamine-assisted psychotherapy in subjects with chronic,  
40 treatment-resistant posttraumatic stress disorder: the first randomized controlled pilot  
41 study. *J Psychopharmacol* 2011;**25**:439–52.  
42  
43 48 Winstock A, Barratt M, Ferris J, *et al*. Global Drug Survey. London: 2017.  
44 [https://www.globaldrugsurvey.com/wp-](https://www.globaldrugsurvey.com/wp-content/themes/globaldrugsurvey/results/GDS2017_key-findings-report_final.pdf)  
45 [content/themes/globaldrugsurvey/results/GDS2017\\_key-findings-report\\_final.pdf](https://www.globaldrugsurvey.com/wp-content/themes/globaldrugsurvey/results/GDS2017_key-findings-report_final.pdf)  
46 (accessed June 2017).  
47  
48 49 Nutt DJ, King LA, Phillips LD. Drug harms in the UK: A multicriteria decision analysis.  
49 *Lancet* 2010;**376**:1558–65.  
50  
51 50 Jung M. Associations of physical and sexual health with suicide attempts among female  
52 sex workers in South Korea. *Sex Disabil* 2013;**31**:275–86.  
53  
54 51 Nemoto T, Boedeker B, Iwamoto M. Social support, exposure to violence and  
55 transphobia, and correlates of depression among male-to-female transgender women with  
56 a history of sex work. *Am J Public Health* 2011;**101**:1980–8.  
57  
58 52 Anisman H, Du L, Palkovits M, *et al*. Serotonin receptor subtype and p11 mRNA  
59 expression in stress-relevant brain regions of suicide and control subjects. *J Psychiatry*  
60 *Neurosci* 2008;**33**:131–41.  
53  
54 53 Carhart-Harris RL, Leech R, Hellyer PJ, *et al*. The entropic brain: a theory of conscious  
55 states informed by neuroimaging research with psychedelic drugs. *Front Hum Neurosci*  
56 2014;**8**. doi:10.3389/fnhum.2014.00020  
57  
58  
59  
60

- 1  
2  
3 54 Carhart-Harris RL, Erritzoe D, Williams T, *et al.* Neural correlates of the psychedelic state  
4 as determined by fMRI studies with psilocybin. *Proc Natl Acad Sci U S A*  
5 2012;**109**:2138–43.  
6  
7 55 Osório FL, Sanches RF, Macedo LR, *et al.* Antidepressant effects of a single dose of  
8 ayahuasca in patients with recurrent depression: a preliminary report. *Rev Bras Psiquiatr*  
9 2016;**37**:13–20.  
10 56 Griffiths RR, Richards WA, McCann U, *et al.* Psilocybin can occasion mystical-type  
11 experiences having substantial and sustained personal meaning and spiritual significance.  
12 *Psychopharmacology (Berl)* 2006;**187**:268–83.  
13 57 Bouso JC, Palhano-Fontes F, Rodriguez-Fornells A, *et al.* Long-term use of psychedelic  
14 drugs is associated with differences in brain structure and personality in humans. *Eur*  
15 *Neuropsychopharmacol* 2015;**25**:483–92.  
16 58 Johnson MW, Garcia-Romeu A, Cosimano MP, *et al.* Pilot study of the 5-HT2AR agonist  
17 psilocybin in the treatment of tobacco addiction. *J Psychopharmacol* 2014;**28**:983–92.  
18 59 Mithoefer MC, Wagner MT, Mithoefer AT, *et al.* Durability of improvement in post-  
19 traumatic stress disorder symptoms and absence of harmful effects or drug dependency  
20 after 3,4-methylenedioxymethamphetamine-assisted psychotherapy: a prospective long-  
21 term follow-up study. *J Psychopharmacol* 2013;**27**:28–39.  
22 60 Rio Navarro J, Cohen J, Rocillo Arechaga E, *et al.* Physical and sexual violence, mental  
23 health indicators, and treatment seeking among street-based population groups in  
24 Tegucigalpa, Honduras. *Pan Am J Public Heal* 2012;**31**:388–95.  
25 61 Stolz J-A, Shannon K, Kerr T, *et al.* Associations between childhood maltreatment and  
26 sex work in a cohort of drug-using youth. *Soc Sci Med* 2007;**65**:1214–21.  
27 62 Argento E, Chettiar J, Nguyen P, *et al.* Prevalence and correlates of nonmedical  
28 prescription opioid use among a cohort of sex workers in Vancouver, Canada. *Int J Drug*  
29 *Policy* 2015;**26**:59–66.  
30 63 Kerr T, Stoltz J, Marshall BDL, *et al.* Childhood Trauma and Injection Drug Use among  
31 High-Risk Youth. *J Adolesc Heal* 2009;**45**:300–2.  
32 64 Ulibarri MD, Strathdee S a, Lozada R, *et al.* Intimate partner violence among female sex  
33 workers in two Mexico-U.S. border cities: partner characteristics and HIV risk-behaviors  
34 as correlates of abuse. *Psychol Trauma Theory, Res Pract Policy* 2010;**2**:318–25.  
35 65 Argento E, Strathdee SA, Goldenberg S, *et al.* Violence, trauma and living with HIV:  
36 Longitudinal predictors of initiating crystal methamphetamine injection among sex  
37 workers. *Drug Alcohol Depend* 2017;**175**:198-204.  
38 66 Tull MT, Gratz KL, Aklin WM, *et al.* A preliminary examination of the relationships  
39 between posttraumatic stress symptoms and crack/cocaine, heroin, and alcohol  
40 dependence. *J Anxiety Disord* 2010;**24**:55–62.  
41 67 Romero-Daza N, Weeks M, Singer M. Conceptualizing the impact of indirect violence on  
42 HIV risk among women involved in street-level prostitution. *Aggress Violent Behav*  
43 2005;**10**:153–70.  
44 68 Wang B, Li X, Stanton B, *et al.* Sexual coercion, HIV-related risk, and mental health  
45 among female sex workers in China. *Health Care Women Int* 2007;**28**:745–62.  
46 69 Morgan CJA, Muetzelfeldt L, Muetzelfeldt M, *et al.* Harms associated with psychoactive  
47 substances: findings of the UK National Drug Survey. *J Psychopharmacol* 2010;**24**:147–  
48 53.  
49  
50  
51  
52  
53  
54  
55  
56  
57  
58  
59  
60

**Table 1: Baseline characteristics of women in Vancouver who thought about or attempted suicide over follow-up, compared to those who did not (N=290)**

| Characteristics                                         | Suicidality<br>n=31 (11%) | No Suicidality<br>n=259 (89%) | p-value |
|---------------------------------------------------------|---------------------------|-------------------------------|---------|
| Age (median, IQR)                                       | 34 (27 to 47)             | 36 (29 to 42)                 | 0.767   |
| Gender/sexual minority                                  | 7 (22.6)                  | 38 (14.7)                     | 0.291   |
| Born in Canada                                          | 29 (93.6)                 | 156 (60.2)                    | <0.001  |
| Indigenous ancestry                                     | 18 (58.1)                 | 75 (29.0)                     | 0.001   |
| Education, high school or greater                       | 10 (32.3)                 | 142 (54.8)                    | 0.017   |
| HIV seropositivity <sup>†</sup>                         | 7 (22.6)                  | 26 (10.0)                     | 0.065   |
| STI seropositivity <sup>†</sup>                         | 3 (9.7)                   | 35 (13.5)                     | 0.778   |
| Homelessness <sup>†</sup>                               | 10 (32.3)                 | 63 (24.3)                     | 0.336   |
| Psychedelic use                                         | 8 (25.8)                  | 71 (27.4)                     | 0.849   |
| Cannabis use                                            | 27 (87.1)                 | 152 (58.7)                    | 0.002   |
| Prescription opioid use                                 | 12 (38.7)                 | 77 (29.7)                     | 0.306   |
| Crack use                                               | 27 (87.1)                 | 157 (60.6)                    | 0.004   |
| Cocaine use                                             | 25 (80.7)                 | 137 (52.9)                    | 0.003   |
| Crystal meth use                                        | 18 (58.1)                 | 72 (27.8)                     | <0.001  |
| Heroin use                                              | 21 (67.7)                 | 120 (46.3)                    | 0.024   |
| Non-injection drug use <sup>†</sup>                     | 27 (87.1)                 | 148 (57.1)                    | 0.001   |
| Injection drug use <sup>†</sup>                         | 16 (51.6)                 | 81 (31.3)                     | 0.023   |
| Physical/sexual client violence <sup>†</sup>            | 5 (16.1)                  | 36 (13.9)                     | 0.784   |
| Physical/sexual childhood abuse                         | 24 (77.4)                 | 112 (43.2)                    | <0.001  |
| Police harassment/arrest <sup>†</sup>                   | 16 (51.6)                 | 91 (35.1)                     | 0.072   |
| <i>Primary place to solicit clients<sup>†</sup></i>     |                           |                               |         |
| Street/public space                                     | 24 (77.4)                 | 118 (45.6)                    |         |
| Indoor/in-call venue                                    | 3 (9.7)                   | 103 (39.8)                    |         |
| Independent/self-advertising (e.g., newspapers, online) | 4 (12.9)                  | 38 (14.7)                     | 0.002   |

<sup>†</sup> Time-updated, last 6 months as reference

**Table 2: Unadjusted and adjusted hazard ratios for predictors of time to suicidality among women in Vancouver, 2010-2014 (N=290)**

| Characteristics                                     | Unadjusted Hazard Ratio (95%CI) | p-value | Adjusted Hazard Ratio (95%CI) | p-value |
|-----------------------------------------------------|---------------------------------|---------|-------------------------------|---------|
| Psychedelic use                                     | 1.00 (0.45 to 2.23)             | 0.995   | 0.40 (0.17 to 0.94)*          | 0.036   |
| Cannabis use                                        | 3.44 (1.21 to 9.79)             | 0.021   |                               |         |
| Prescription opioid use                             | 1.88 (0.91 to 3.90)             | 0.089   |                               |         |
| Crack use                                           | 3.06 (1.07 to 8.74)             | 0.037   |                               |         |
| Cocaine use                                         | 2.53 (1.03 to 6.22)             | 0.043   |                               |         |
| Crystal meth use                                    | 3.73 (1.75 to 7.97)             | <0.001  | 3.25 (1.47 to 7.21)*          | 0.004   |
| Heroin use                                          | 2.26 (0.99 to 5.13)             | 0.053   |                               |         |
| HIV seropositivity <sup>†</sup>                     | 2.15 (0.92 to 5.06)             | 0.078   |                               |         |
| Childhood abuse                                     | 3.92 (1.69 to 9.09)             | 0.002   | 3.54 (1.49 to 8.40)*          | 0.004   |
| Indigenous ancestry                                 | 2.76 (1.34 to 5.67)             | 0.006   |                               |         |
| Canadian born                                       | 6.72 (1.62 to 27.95)            | 0.009   |                               |         |
| Homelessness <sup>†</sup>                           | 2.55 (1.19 to 5.44)             | 0.016   | 1.95 (0.91 to 4.17)*          | 0.085   |
| <i>Primary place to solicit clients<sup>†</sup></i> |                                 |         |                               |         |
| Indoor venue (vs. street)                           | 0.19 (0.06 to 0.66)             | 0.009   |                               |         |
| Independent (vs. street)                            | 0.38 (0.14 to 1.05)             | 0.061   |                               |         |

<sup>†</sup> Time-updated, last 6 months as reference

\*Final multivariable model determined using backward selection with best overall fit, as indicated by the lowest Akaike information criterion (AIC) value.

STROBE 2007 (v4) Statement—Checklist of items that should be included in reports of cohort studies

| Section/Topic             | Item # | Recommendation                                                                                                                                                                       | Reported on page # |
|---------------------------|--------|--------------------------------------------------------------------------------------------------------------------------------------------------------------------------------------|--------------------|
| Title and abstract        | 1      | (a) Indicate the study’s design with a commonly used term in the title or the abstract                                                                                               | Title page, 1      |
|                           |        | (b) Provide in the abstract an informative and balanced summary of what was done and what was found                                                                                  | 1                  |
| <b>Introduction</b>       |        |                                                                                                                                                                                      |                    |
| Background/rationale      | 2      | Explain the scientific background and rationale for the investigation being reported                                                                                                 | 3, 4               |
| Objectives                | 3      | State specific objectives, including any prespecified hypotheses                                                                                                                     | 4, 5               |
| <b>Methods</b>            |        |                                                                                                                                                                                      |                    |
| Study design              | 4      | Present key elements of study design early in the paper                                                                                                                              | 5, 6               |
| Setting                   | 5      | Describe the setting, locations, and relevant dates, including periods of recruitment, exposure, follow-up, and data collection                                                      | 5, 6               |
| Participants              | 6      | (a) Give the eligibility criteria, and the sources and methods of selection of participants. Describe methods of follow-up                                                           | 5                  |
|                           |        | (b) For matched studies, give matching criteria and number of exposed and unexposed                                                                                                  | n/a                |
| Variables                 | 7      | Clearly define all outcomes, exposures, predictors, potential confounders, and effect modifiers. Give diagnostic criteria, if applicable                                             | 6, 7               |
| Data sources/ measurement | 8*     | For each variable of interest, give sources of data and details of methods of assessment (measurement). Describe comparability of assessment methods if there is more than one group | 5-7                |
| Bias                      | 9      | Describe any efforts to address potential sources of bias                                                                                                                            | 5, 10              |
| Study size                | 10     | Explain how the study size was arrived at                                                                                                                                            | 6, 7               |
| Quantitative variables    | 11     | Explain how quantitative variables were handled in the analyses. If applicable, describe which groupings were chosen and why                                                         | 6, 7               |
| Statistical methods       | 12     | (a) Describe all statistical methods, including those used to control for confounding                                                                                                | 6, 7               |
|                           |        | (b) Describe any methods used to examine subgroups and interactions                                                                                                                  | 7                  |
|                           |        | (c) Explain how missing data were addressed                                                                                                                                          | 7                  |
|                           |        | (d) If applicable, explain how loss to follow-up was addressed                                                                                                                       | 7                  |
|                           |        | (e) Describe any sensitivity analyses                                                                                                                                                | n/a                |
| <b>Results</b>            |        |                                                                                                                                                                                      |                    |

|                          |     |                                                                                                                                                                                                              |             |
|--------------------------|-----|--------------------------------------------------------------------------------------------------------------------------------------------------------------------------------------------------------------|-------------|
| Participants             | 13* | (a) Report numbers of individuals at each stage of study—eg numbers potentially eligible, examined for eligibility, confirmed eligible, included in the study, completing follow-up, and analysed            | 7, 8        |
|                          |     | (b) Give reasons for non-participation at each stage                                                                                                                                                         | 6, 7        |
|                          |     | (c) Consider use of a flow diagram                                                                                                                                                                           |             |
| Descriptive data         | 14* | (a) Give characteristics of study participants (eg demographic, clinical, social) and information on exposures and potential confounders                                                                     | 7-9, 19, 20 |
|                          |     | (b) Indicate number of participants with missing data for each variable of interest                                                                                                                          | 7, 8        |
|                          |     | (c) Summarise follow-up time (eg, average and total amount)                                                                                                                                                  | 8           |
| Outcome data             | 15* | Report numbers of outcome events or summary measures over time                                                                                                                                               | 8           |
| Main results             | 16  | (a) Give unadjusted estimates and, if applicable, confounder-adjusted estimates and their precision (eg, 95% confidence interval). Make clear which confounders were adjusted for and why they were included | 9, 20, 7    |
|                          |     | (b) Report category boundaries when continuous variables were categorized                                                                                                                                    | n/a         |
|                          |     | (c) If relevant, consider translating estimates of relative risk into absolute risk for a meaningful time period                                                                                             | n/a         |
| Other analyses           | 17  | Report other analyses done—eg analyses of subgroups and interactions, and sensitivity analyses                                                                                                               | n/a         |
| <b>Discussion</b>        |     |                                                                                                                                                                                                              |             |
| Key results              | 18  | Summarise key results with reference to study objectives                                                                                                                                                     | 9           |
| <b>Limitations</b>       |     |                                                                                                                                                                                                              |             |
| Interpretation           | 20  | Give a cautious overall interpretation of results considering objectives, limitations, multiplicity of analyses, results from similar studies, and other relevant evidence                                   | 9, 10       |
| Generalisability         | 21  | Discuss the generalisability (external validity) of the study results                                                                                                                                        | 10          |
| <b>Other information</b> |     |                                                                                                                                                                                                              |             |
| Funding                  | 22  | Give the source of funding and the role of the funders for the present study and, if applicable, for the original study on which the present article is based                                                | 14          |

\*Give information separately for cases and controls in case-control studies and, if applicable, for exposed and unexposed groups in cohort and cross-sectional studies.

**Note:** An Explanation and Elaboration article discusses each checklist item and gives methodological background and published examples of transparent reporting. The STROBE checklist is best used in conjunction with this article (freely available on the Web sites of PLoS Medicine at <http://www.plosmedicine.org/>, Annals of Internal Medicine at <http://www.annals.org/>, and Epidemiology at <http://www.epidem.com/>). Information on the STROBE Initiative is available at [www.strobe-statement.org](http://www.strobe-statement.org).
